# Supplementary material for: Utilization of innovative medical technologies in German inpatient care: does evidence matter?
Source: PubMed Central journal article supplement (PMC10546629; doi:10.1186/s12961-023-01047-w), 2023-10-02
Supplement: 12961_2023_1047_MOESM1_ESM.pdf [file 12961_2023_1047_MOESM1_ESM.pdf]

# Additional file 1: Utilization of Innovative Medical Technologies in German Inpatient Care: Does Evidence Matter?

## Table of contents

|                                                                                                                |    |
|----------------------------------------------------------------------------------------------------------------|----|
| Table of contents.....                                                                                         | 1  |
| Table of abbreviations.....                                                                                    | 3  |
| Appendix 1: Description of included technologies.....                                                          | 4  |
| Table 1.1 Description of technologies and respective procedure codes (alphabetically sorted) ...               | 4  |
| Table 1.2 Technologies, products and year of CE marking sorted by anatomical region .....                      | 7  |
| Appendix 2: Searched sources for evidence .....                                                                | 10 |
| Table 2.1 Sources of evidence .....                                                                            | 10 |
| Appendix 3: Inclusion criteria of publications .....                                                           | 11 |
| Table 3.1 General inclusion and exclusion criteria.....                                                        | 12 |
| Figure 3.1 Classification of evidence - excerpt of proceeding rules by G-BA 2. chapter § 11 (3) [4, 5].....    | 13 |
| Appendix 4: Screening of records obtained from registries .....                                                | 14 |
| Appendix 5: Data extraction.....                                                                               | 15 |
| Table 5.1 Extracted information per publication (individual study) .....                                       | 16 |
| Table 5.2 Extracted information per publication (systematic review, meta-analysis, HTA) .....                  | 17 |
| Table 5.3 Extracted information per guideline.....                                                             | 17 |
| Appendix 6: Risk of bias (RoB) assessment of RCTs .....                                                        | 18 |
| Table 6.1 Risk of bias (RoB) tool used for RoB assessment.....                                                 | 18 |
| Appendix 7: Description of the regression model.....                                                           | 19 |
| Description of the variable with weighted cumulative evidence – the “new variable” .....                       | 19 |
| Derivation of the regression model.....                                                                        | 20 |
| Appendix 8: Results of the search for evidence per database and screening step.....                            | 21 |
| Table 8.1 Results of the search for evidence (individual studies, systematic review, meta-analysis, HTA) ..... | 21 |
| Table 8.2 Results of the search for guidelines, HTA, safety notifications and in clinical trial registers..... | 22 |
| Appendix 9: Characteristics of included studies .....                                                          | 23 |
| Figure 9.0.1 Randomized controlled trials and results of Risk of Bias (RoB) assessment .....                   | 23 |
| Table 9.1 Number of included publications with systematic reviews and randomized controlled trials.....        | 24 |

|                                                                                                                                                                |    |
|----------------------------------------------------------------------------------------------------------------------------------------------------------------|----|
| Appendix 10: Development of body of evidence .....                                                                                                             | 25 |
| Figure 10.1 Evidence development: Share of publications of LoE 1-3 studies on all publications and its trend of grow by anatomical system and technology ..... | 25 |
| Figure 10.2 Evidence development: Increase of accumulated number of publications LoE 1-3 and LoE 4 studies by anatomic system and technology .....             | 26 |
| Appendix 11: Results of evidence for technologies in sample .....                                                                                              | 27 |
| Figure 11.1 Negative or inconclusive results in publications by LoE and year of publication based on all technologies of sample .....                          | 27 |
| Figure 11.2 All categories of results in publications by LoE and year of publication based on all technologies of sample .....                                 | 27 |
| Figure 11.3 (A-C) Results in publications presented by LoE, year of publication and technology (by availability of negative results) .....                     | 28 |
| Appendix 12: Recommendations from clinical guidelines .....                                                                                                    | 32 |
| Figure 12.1 Recommendations from identified clinical guidelines .....                                                                                          | 32 |
| Appendix 13: References .....                                                                                                                                  | 33 |
| References .....                                                                                                                                               | 33 |

## Table of abbreviations

|               |                                                                                                                                 |
|---------------|---------------------------------------------------------------------------------------------------------------------------------|
| ACD           | Anticoagulation with citrate during dialysis                                                                                    |
| ACT           | Adjustable continence therapy                                                                                                   |
| BVS           | Bioresorbable Vascular Scaffold in coronary vessels                                                                             |
| BfArM         | Federal Institute for Drugs and Medical Devices ( <i>Bundesinstitut für Arzneimittel und Medizinprodukte</i> )                  |
| DCB-AV        | Drug-coated balloon catheter in abdominal vessels                                                                               |
| DCB-CV        | Drug-coated balloon catheter in coronary vessels                                                                                |
| DCB-IV        | Drug-coated balloon catheter in intracranial vessels                                                                            |
| DCB-LLV       | Drug-coated balloon catheter in lower leg vessels                                                                               |
| DCB-ULV       | Drug-coated balloon catheter in upper leg vessels                                                                               |
| DEB-TACE      | Drug-eluting beads for transarterial chemoembolization                                                                          |
| DES-LLV       | Implantation of a drug-eluting stent in lower leg vessels                                                                       |
| DES-ULV       | Implantation of a drug-eluting stent in upper leg vessels                                                                       |
| DRG           | Diagnosis-Related Groups                                                                                                        |
| EABO          | Endoaortic balloon occlusion with extracorporeal circulation                                                                    |
| EL-P/ ICD     | Excimer laser extraction of pacemaker and defibrillator electrodes                                                              |
| ER-ABL        | Cardiac event recorder after ablative measures for atrial fibrillation / atrial tachycardia                                     |
| FD-ULV        | Flow-diverter (Hemodynamically effective implant for endovascular treatment of peripheral aneurysms) in upper leg vessels       |
| F-TUR         | Fluorescence-assisted transurethral resection                                                                                   |
| G-BA          | Federal Joint Committee ( <i>Gemeinsamer Bundesausschuss</i> )                                                                  |
| HCO           | Dialysis with high cut-off dialysis membrane                                                                                    |
| IABC          | Bioactive coils for intracranial aneurysm therapy                                                                               |
| InEK          | Institute for the Hospital Remuneration System ( <i>Institut fuer das Entgeltsystem im Krankenhaus</i> )                        |
| IQWiG         | Institute for Quality and Efficiency in Health Care ( <i>Institut für Qualität und Wirtschaftlichkeit im Gesundheitswesen</i> ) |
| LVRC          | Lung volume reduction by insertion of coils                                                                                     |
| MDS           | National Association of Health Insurance Funds (Medizinischer Dienst des Spitzenverbandes Bund der Krankenkassen e.V.)          |
| MT            | Intracranial endovascular mechanical thrombectomy                                                                               |
| MVAC          | Mitral valve annuloplasty with clamp                                                                                            |
| NUB           | <i>New Diagnostic and Treatment Methods (Neue Untersuchungs- und Behandlungsmethode)</i>                                        |
| OPS           | German Procedures Classification ( <i>Operationen- und Prozedurenschlüssel</i> )                                                |
| PECLA/<br>iLA | Pumpless Extracorporeal Lung Assist/ Interventional Lung Assist                                                                 |
| pVAD          | Percutaneous ventricular assist device (Microaxial blood pump)                                                                  |
| RCT           | Randomized controlled trial                                                                                                     |
| RoB           | Risk of bias                                                                                                                    |
| SE-BMS        | Self-expanding bare metal stents in coronary vessels                                                                            |
| TAVI          | Transcatheter aortic valve implantation                                                                                         |

## Appendix 1: Description of included technologies

From the total sample of 27 technologies [1] 25 were included into the analysis. Of these, 19 are used for diseases of the circulatory system, four for diseases of the urogenital system, and two for respiratory conditions.

Table 1.1 Description of technologies and respective procedure codes (alphabetically sorted)

| Abbreviation of NUB (N=25) | Area of application                                                                                                                | Description                                                                                                                                                                                                                      | Hospital procedures: Min (year)/ Max (year) <sup>1</sup> | Procedure codes <sup>2</sup>                                                                      |
|----------------------------|------------------------------------------------------------------------------------------------------------------------------------|----------------------------------------------------------------------------------------------------------------------------------------------------------------------------------------------------------------------------------|----------------------------------------------------------|---------------------------------------------------------------------------------------------------|
| ACD                        | Citrate anticoagulation as a heparin substitute during renal replacement therapy for acute kidney injury or chronic kidney disease | Extracorporeal renal replacement therapy with substitution of heparin with citrate, usually in cases of heparin intolerance or risk of bleeding                                                                                  | 22336 (2010) / 42203 (2017)                              | 8-854.3#, 8-854.5#, 8-854.7#, 8-855.4#, 8-855.6#, 8-855.8#                                        |
| ACT                        | Treatment of severe urinary incontinence                                                                                           | The fully implantable fluid-filled silicone balloons are placed on both sides of the urethra at the bladder outlet for the treatment of urinary incontinence in men and women.                                                   | 327 (2007) / 1843 (2009)                                 | 5-596.7#                                                                                          |
| BVS                        | Treatment of coronary heart disease (CHD)                                                                                          | Implant is inserted endovascularly into the coronary vessel and keeps the stenosed lesion mechanically open for a period of several years, during which time it is completely reabsorbed by the body.                            | 1016 (2017) / 7494 (2014)                                | 8-83d0#                                                                                           |
| DCB-CV                     | Treatment of CHD                                                                                                                   | Further development of a conventional balloon catheter: the surface is coated with an antiproliferative drug which is released immediately at the site of vasoconstriction and is intended to counteract restenosis              | 533 (2008) / 20220 (2017)                                | 8-837.0# in connection to 8-83b.b* (*= 0, 2-9)                                                    |
| DCB-AV                     | Treatment of PAD in abdominal vessels                                                                                              |                                                                                                                                                                                                                                  | 3 (2008) / 5061 (2017)                                   | 8-836.09 [before 2017] or 8-836.0q, 8-836.0r [in 2017] in connection to 8-83b.b* (*= 0, 2-9, a-d) |
| DCB-IV                     | Treatment of PAD in intracranial vessels                                                                                           |                                                                                                                                                                                                                                  | 2 (2008) / 115 (2013)                                    | 8-836.00 in connection to 8-83b.b* (*= 0, 2-9, a-d)                                               |
| DCB-LLV                    | Treatment of PAD in lower leg vessels                                                                                              |                                                                                                                                                                                                                                  | 26 (2008) / 12281 (2017)                                 | 8-836.0c in connection to 8-83b.b*(*= 0, 2-9, a-d)                                                |
| DCB-ULV                    | Treatment of PAD in upper leg vessels                                                                                              |                                                                                                                                                                                                                                  | 13 (2008) / 31350 (2017)                                 | 8-836.0b [before 2017] or 8-836.0s, 8-836.0t [in 2017] in connection to 8-83b.b*(*= 0, 2-9, a-d)  |
| DEB-TACE                   | Treatment of hepatocellular carcinoma                                                                                              | Hydrogel microspheres made of polyvinyl alcohol that can be loaded with doxorubicin. They are used for transarterial chemoembolization of vessels supplying malignant tumors, delivering a local, sustained dose of doxorubicin. | 345 (2007) / 2870 (2015)                                 | 8-836.k in connection to 8-83b.10                                                                 |

| Abbreviation of NUB (N=25) | Area of application                                                                                                                 | Description                                                                                                                                                                                                                                                                                                                                                  | Hospital procedures: Min (year)/ Max (year) <sup>1</sup> | Procedure codes <sup>2</sup>                                                                          |
|----------------------------|-------------------------------------------------------------------------------------------------------------------------------------|--------------------------------------------------------------------------------------------------------------------------------------------------------------------------------------------------------------------------------------------------------------------------------------------------------------------------------------------------------------|----------------------------------------------------------|-------------------------------------------------------------------------------------------------------|
| DES-LLV                    | Treatment of peripheral arterial occlusive disease (PAD) in lower leg vessels                                                       | Stents coated with cytostatic drugs (paclitaxel) or immunosuppressants (sirolimus, everolimus) (so-called drug eluting stents, DES); the coating is intended to reduce the risk of restenosis.                                                                                                                                                               | 374 (2009) / 2310 (2017)                                 | 8-841.0c, 8-841.1c, 8-841.2c, 8-841.3c, 8-841.4c, 8-841.5c                                            |
| DES-ULV                    | Treatment of PAD in upper leg vessels                                                                                               | Stents coated with cytostatic drugs (paclitaxel) or immunosuppressants (sirolimus, everolimus) (so-called drug eluting stents, DES); the coating is intended to reduce the risk of restenosis.                                                                                                                                                               | 166 (2009) / 2230 (2017)                                 | 8-841.0*, 8-841.1*, 8-841.2*, 8-841.3*, 8-841.4*, 8-841.5*<br>(* = b [before 2017], s or t [in 2017]) |
| EABO                       | Cardiac surgery without thoracotomy                                                                                                 | Closure of the ascending aorta by balloon occlusion from the inside (endo-clamping), arrest of the heart by intra-aortic balloon occlusion cannulation.                                                                                                                                                                                                      | 129 (2010) / 526 (2017)                                  | 8-851.01, 8-851.11, 8-851.31, 8-851.41, 8-851.51.                                                     |
| EL-P/ICD                   | Removal of defibrillator or pacemaker electrodes from the heart if indicated (e.g., infection or malfunction)                       | Circularly arranged optical fibers with an inner lumen that can accommodate the pacing electrode. A device is advanced via an electrode lead to the electrode tip located in the heart, the excimer laser emits short, high energy, low temperature pulses that ablate small amounts of tissue (photoablation) and expose the electrode.                     | 54 (2008) / 797 (2016)                                   | 5-378.a0 in connection to 5-378.1#, 5-378.2#, 5-378.6#, 5-378.7#                                      |
| ER-ABL                     | Diagnosis of cardiac arrhythmias (tachyarrhythmia, atrial fibrillation) after ablative procedures                                   | Device for continuous monitoring of ECG information over a long period of time, which is implanted subcutaneously on an outpatient basis under local anaesthesia. A single-channel ECG is continuously recorded in an endless loop („loop recorder“) via surface electrodes on the housing. Pathological sequences can be automatically detected and stored. | 5 (2005) / 956 (2017)                                    | 5-377.8 in connection to 8-835.##                                                                     |
| FD-ULV                     | Treatment of aneurysm of upper leg vessels                                                                                          | Self-expanding blood flow modulators (grid/stent structures) which are placed endovascularly directly into the aneurysm outpouching so that a functional separation between the outflow vessel and the aneurysm outpouching is created at the aneurysm base.                                                                                                 | 63 (2016) / 121 (2011)                                   | 8-84b.0*, 8-84b.1*, 8-84b.2*, 8-84b.3*, 8-84b.4*, 8-84b.5*<br>(* = b [before 2017], s or t [in 2017]) |
| F-TUR                      | Diagnosis of (non-muscle invasive) bladder carcinoma or carcinoma in situ or lesions of unclear origin of the bladder and resection | Enhancement of the visual contrast between benign tissue and tumor cells by inducing a photodynamic process leading to the selective fluorescence emission of tumor cells                                                                                                                                                                                    | 32 (2006) / 2763 (2009)                                  | OPS 5-573.41 or 1-661 in connection to 5-989                                                          |
| HCO                        | Treatment of acute kidney injury caused by low weight molecules                                                                     | Dialysis membrane with the aim to selectively remove low weight molecules (molecular weight between 15-60 kDa, such as light chains in multiple myeloma).                                                                                                                                                                                                    | 92 (2009) / 438 (2016)                                   | 8-854.8                                                                                               |
| IABC                       | Treatment of intracranial aneurysms                                                                                                 | Coils endovascularly inserted with a microcatheter and coated with bioactive materials (polyglycolic acid, polylactic acid) to better seal the aneurysm.                                                                                                                                                                                                     | 686 (2017) / 1180 (2012)                                 | 8-836.m0 in connection to 8-83b.31                                                                    |

| Abbreviation of NUB (N=25) | Area of application                                                          | Description                                                                                                                                                                                                                            | Hospital procedures: Min (year)/ Max (year) <sup>1</sup> | Procedure codes <sup>2</sup>                                                                                |
|----------------------------|------------------------------------------------------------------------------|----------------------------------------------------------------------------------------------------------------------------------------------------------------------------------------------------------------------------------------|----------------------------------------------------------|-------------------------------------------------------------------------------------------------------------|
| LVRC                       | Treatment of lung emphysema                                                  | Lung volume reduction through the bronchoscopic use of spirals (coils), which are applied stretched and after release take their predetermined shape and pull the lung parenchyma along.                                               | 388 (2012) / 1079 (2014)                                 | 5-339.8                                                                                                     |
| MT                         | Treatment of acute ischemic stroke (intracranial)                            | Retriever systems inserted endovascularly into the affected vessel, which mechanically remove thrombi                                                                                                                                  | 74 (2007) / 6499 (2017)                                  | 8-836.80 in connection to 8-83b.80, 8-83b.82, 8-83b.83; 8-836.80 in connection 8-83b.84, 8-83b.85, 8-83b.86 |
| MVAC                       | Treatment of mitral valve regurgitation                                      | Endovascular indirect tightening of the connective tissue of the mitral valve annulus to bring dehiscent mitral valve leaflets closer together and reduce insufficiency.                                                               | 21 (2007) / 231 (2010)                                   | 5-35a.2                                                                                                     |
| PECLA/iLA                  | Treatment of acute respiratory distress syndrome                             | System for pumpless support of lung function for emergency and intensive care medicine. Carbon dioxide is removed from arterial blood and oxygen is added by membrane diffusion.                                                       | 88 (2017) / 514 (2011)                                   | 8-852.2#                                                                                                    |
| pVAD                       | Acute heart failure, cardiogenic shock, or cardiovascular support during PCI | Minimally invasive heart support system (left ventricle) that can be introduced into the heart via a percutaneous access in the groin via the femoral artery without opening the chest and can also be removed in the same way.        | 72 (2006) / 2546 (2017)                                  | 8-839.42, 8-839.43                                                                                          |
| SE-BMS                     | Treatment of CHD                                                             | Stents made of nitinol, which have a memory effect in the sense of shape memory, and negative recoil. This can mean additional lumen gain in the stented vessel segment over the course of days and weeks after coronary intervention. | 30 (2017) / 138 (2014)                                   | 8-83d.1#                                                                                                    |
| TAVI                       | Treatment of valvular insufficiency or stenosis of the aortic valve          | Minimally invasive replacement of heart valves, which exposes the patient to less intraoperative stress. The new valve is placed in position via a catheter and deployed on site.                                                      | 68 (2006) / 20021 (2017)                                 | 5-35a.0#                                                                                                    |

**Notes:** <sup>1</sup>Data was provided by the funder, available at [2]; <sup>2</sup>All procedure codes from the OPS version 2005 to the OPS version 2017 can be accessed on the pages of the Federal Institute for Drugs and Medical Devices (BfArM), formerly the German Institute of Medical Documentation and Information (DIMDI) [3]; # The „#“ symbol replaces the 5th or 6th digit in the procedure code, indicating that the codes with these positions have been included in the calculation of procedure numbers. The „#“ represents any number or letter within the specified root, as defined in the procedure catalogue.

**Abbreviations:** ACD - Anticoagulation with citrate during dialysis; ACT - Adjustable continence therapy; BVS - Bioresorbable Vascular Scaffold in coronary vessels; DCB-AV - Drug-coated balloon catheter in abdominal vessels; DCB-CV - Drug-coated balloon catheter in coronary vessels; DCB-IV - Drug-coated balloon catheter in intracranial vessels; DCB-LLV - Drug-coated balloon catheter in lower leg vessels; DCB-ULV - Drug-coated balloon catheter in upper leg vessels; DEB-TACE - Drug-eluting beads for trans-arterial chemoembolization; DES-LLV - Implantation of a drug-eluting stent in lower leg vessels; DES-ULV - Implantation of a drug-eluting stent in upper leg vessels; EABO – Endo-aortic balloon occlusion with extracorporeal circulation; EL-P/ ICD - Excimer laser extraction of pacemaker and defibrillator electrodes; ER-ABL - Cardiac event recorder after ablative measures for atrial fibrillation / atrial tachycardia; FD-ULV - Flow-diverter (Hemodynamically effective implant for endovascular treatment of peripheral aneurysms) in upper leg vessels; F-TUR - Fluorescence-assisted transurethral resection; HCO - Dialysis with high cut-off dialysis membrane; IABC - Bioactive coils for intracranial aneurysm therapy; LVRC - Lung volume reduction by insertion of coils; MT - Intracranial endovascular mechanical thrombectomy; MVAC - Mitral valve annuloplasty with clamp; NUB – New examination and treatment method / Neue Untersuchungs- und Behandlungsmethode; PECLA/ iLA - Pumpless Extracorporeal Lung Assist/ Interventional Lung Assist; pVAD - Percutaneous ventricular assist device (Micro-axial blood pump); SE-BMS - Self-expanding bare metal stents in coronary vessels; TAVI - Transcatheter aortic valve implantation

Across the 25 included technologies, the number of identified products available in Europe and Germany between 2005 and 2017 ranges from one (e.g., MVAC) to 16 (MT) (Table 1.2). Most products were CE-certified for the first time after 2000. For some technologies, it was not possible to determine a product intended specifically for the indication (i.e., DCB-AV, DCB-IV, and DES-LLV), and for some products the year of approval was unavailable.

Table 1.2 Technologies, products and year of CE marking sorted by anatomical region

| Table 1.2 Technologies in sample by anatomical region                  |                                                                 |                                                      |                                             |                                                                   |                                                           |      |
|------------------------------------------------------------------------|-----------------------------------------------------------------|------------------------------------------------------|---------------------------------------------|-------------------------------------------------------------------|-----------------------------------------------------------|------|
| Anatomical regions of procedures                                       |                                                                 | Procedure                                            | Abb                                         | Product (Manufacturer)                                            | CE-Mark year                                              |      |
| Respiratory system                                                     | Lung volume reduction by insertion of coils                     |                                                      | LVRC                                        | ELEVAIR Endobronchial Coil System (PneuRX, now Boston Scientific) | 2010                                                      |      |
|                                                                        | Pumpless Extracorporeal Lung Assist/ Interventional Lung Assist |                                                      | PECLA/iLA                                   | Novalung iLA (Novalung)                                           | 2002                                                      |      |
| Cardiovascular system                                                  | Cardiac procedures                                              | Ventricular                                          | TAVI                                        | SAPIEN (Edwards Lifesciences)                                     | 2007                                                      |      |
|                                                                        |                                                                 |                                                      |                                             | CoreVALVE (Medtronic Inc.)                                        | 2007                                                      |      |
|                                                                        |                                                                 |                                                      |                                             | Acurate (Symetis Inc.)                                            | 2011                                                      |      |
|                                                                        |                                                                 |                                                      |                                             | JenaValve TA/ neo TF (Symetis Inc.)                               | 2011                                                      |      |
|                                                                        |                                                                 |                                                      |                                             | Direct Flow Medical (Direct Flow Medical, Inc.)                   | 2013                                                      |      |
|                                                                        |                                                                 |                                                      |                                             | Lotus (Boston Scientific)                                         | 2013                                                      |      |
|                                                                        |                                                                 |                                                      |                                             | Portico (St. Jude Medical)                                        | 2015                                                      |      |
|                                                                        |                                                                 |                                                      |                                             | Centera (Edwards Lifesciences)                                    | 2017                                                      |      |
|                                                                        |                                                                 | Allegra (New Valve Technology, now Biosensors)       | 2017                                        |                                                                   |                                                           |      |
|                                                                        |                                                                 | Mitral valve annuloplasty with clamp                 | MVAC                                        | CARILLON™ Mitral Contour System (Cardiac Dimensions)              | 2009                                                      |      |
|                                                                        | Percutaneous ventricular assist device (Microaxial blood pump)  | pVAD                                                 | Impella 5.0 (Abiomed)                       | 2001                                                              |                                                           |      |
|                                                                        |                                                                 |                                                      | Impella 2.5 (Abiomed)                       | 2010                                                              |                                                           |      |
|                                                                        |                                                                 |                                                      | Impella CP (Abiomed)                        | 2014                                                              |                                                           |      |
|                                                                        |                                                                 |                                                      | Impella RP (Abiomed)                        | 2014                                                              |                                                           |      |
|                                                                        | HeartMate PHP (Abbott)                                          |                                                      | 2015                                        |                                                                   |                                                           |      |
|                                                                        | Other cardiac                                                   | ER-ABL                                               | Reveal Plus/Reveal XT/Reveal DX (Medtronic) | 2007                                                              |                                                           |      |
|                                                                        |                                                                 |                                                      | BioMonitor I (BIOTRONIK)                    | 2012                                                              |                                                           |      |
|                                                                        |                                                                 |                                                      | Reveal LinQ (Medtronic Inc)                 | 2014                                                              |                                                           |      |
|                                                                        |                                                                 |                                                      | BioMonitor II (BIOTRONIK)                   | 2015                                                              |                                                           |      |
|                                                                        |                                                                 |                                                      | Confirm Rx (Abbott)                         | 2017                                                              |                                                           |      |
| Excimer laser extraction of pacemaker and defibrillator electrodes     | EL-P/ICD                                                        | SLS I (Spectranetics)                                | 1994                                        |                                                                   |                                                           |      |
| Endovascular procedures                                                | Intracranial                                                    | Drug-coated balloon catheter in intracranial vessels | DCB-IV                                      | none (DCB for coronary vessels)                                   | n.a.                                                      |      |
|                                                                        |                                                                 | Bioactive coils for intracranial aneurysm therapy    | IABC                                        | Cerecyte (Micrus Endovascular)                                    | 2005                                                      |      |
|                                                                        | Axium MicroFX (ev3/Medtronic)                                   |                                                      |                                             | 2007                                                              |                                                           |      |
|                                                                        | Matrix 1. & 2. gen (Boston Scientific)                          |                                                      |                                             | n.a.                                                              |                                                           |      |
|                                                                        | Intracranial endovascular mechanical thrombectomy               | MT                                                   |                                             |                                                                   | Nexu (ev3/Covidien/Micro Therapeutics/ Medtronic)         | n.a. |
|                                                                        |                                                                 |                                                      |                                             |                                                                   | Merci™ Retriever System (Concentric Medical, now Stryker) | 2002 |
|                                                                        |                                                                 |                                                      |                                             |                                                                   | Catch™-Retriever (Balt)                                   | 2004 |
|                                                                        |                                                                 |                                                      |                                             |                                                                   | Phenox Clot Retriever (Phenox, Bochum, Deutschland)       | 2006 |
|                                                                        |                                                                 |                                                      |                                             |                                                                   | Amplatz Goose-Neck™ (Microvena)                           | n.a. |
|                                                                        |                                                                 |                                                      |                                             |                                                                   | Attractor-18™ (Boston Scientific)                         | n.a. |
| Distal Access Catherer (DAC™, initial Concentric Medical, now Stryker) | n.a.                                                            |                                                      |                                             |                                                                   |                                                           |      |
| Catch Plus (Balt)                                                      | 2005                                                            |                                                      |                                             |                                                                   |                                                           |      |

| Anatomical regions of procedures                          | Procedure                  | Abb                                                                                                                       | Product (Manufacturer)                            | CE-Mark                                                                              |       |
|-----------------------------------------------------------|----------------------------|---------------------------------------------------------------------------------------------------------------------------|---------------------------------------------------|--------------------------------------------------------------------------------------|-------|
|                                                           |                            |                                                                                                                           |                                                   | year                                                                                 |       |
|                                                           |                            |                                                                                                                           | Solitaire™ (Micro Therapeutics, now Medtronic)    | 2009                                                                                 |       |
|                                                           |                            |                                                                                                                           | Trevo™ (Concentric Medical, now Stryker)          | 2010                                                                                 |       |
|                                                           |                            |                                                                                                                           | Revive (Codman Neuro Johnson&Johnson)             | 2011                                                                                 |       |
|                                                           |                            |                                                                                                                           | pREset (Phenox)                                   | 2011                                                                                 |       |
|                                                           |                            |                                                                                                                           | Mind Frame Capture LP (Mindframe, now Medtronic)  | 2011                                                                                 |       |
|                                                           |                            |                                                                                                                           | APERIO™                                           | 2012                                                                                 |       |
|                                                           |                            |                                                                                                                           | Embotrap (Neuravi, now Cerenovus Johnson&Johnson) | 2013                                                                                 |       |
|                                                           |                            |                                                                                                                           | BONnet (Phenox)                                   | 2013                                                                                 |       |
|                                                           |                            |                                                                                                                           | Eric (Microvention)                               | 2014                                                                                 |       |
|                                                           | Thoracal                   | Endo-aortic balloon occlusion with extracorporeal circulation                                                             | EABO                                              | Heartport (Heartport, now Edwards Lifesciences)                                      | 1997  |
|                                                           |                            |                                                                                                                           |                                                   | Estech arterial RAP (ESTECH)                                                         | 1999  |
|                                                           |                            |                                                                                                                           |                                                   | EndoClamp (CardioVations, Ethicon Inc., Johnson & Johnson, now Edwards Lifesciences) | 2012  |
|                                                           |                            |                                                                                                                           |                                                   | IntraClude (Edwards Lifesciences)                                                    | 2012  |
|                                                           | Coronary                   | Bioresorbable Vascular Scaffold in coronary vessels                                                                       | BVS                                               | Absorb (Abbott)                                                                      | 2010  |
|                                                           |                            |                                                                                                                           |                                                   | DESolve (Elixir Medical)                                                             | 2014  |
|                                                           |                            |                                                                                                                           |                                                   | Magmaris (Biotronik)                                                                 | 2016  |
|                                                           |                            |                                                                                                                           |                                                   | Fantom (REVA Medical, Inc.)                                                          | 2017  |
|                                                           |                            | Self-expanding bare metal stents in coronary vessels                                                                      | SE-BMS                                            | Radius (Scimed Life Systems, Inc, now Boston Scientific)                             | 2000* |
|                                                           |                            |                                                                                                                           |                                                   | Cappella Sideguard (Cappella)                                                        | 2009  |
|                                                           |                            |                                                                                                                           |                                                   | vProtect Luminal Shield (Prescient Medical)                                          | 2009  |
|                                                           |                            |                                                                                                                           |                                                   | CardioMind Sparrow (CardioMind)                                                      | 2010  |
|                                                           |                            |                                                                                                                           |                                                   | Stentys (Stentys SA)                                                                 | 2010  |
|                                                           |                            | Drug-coated balloon catheter in coronary vessels                                                                          | DCB-CV                                            | Dior PCB (Eurocor)                                                                   | 2007  |
|                                                           |                            |                                                                                                                           |                                                   | Sequent Please Neo (B.Braun Melsungen)                                               | 2009  |
|                                                           |                            |                                                                                                                           |                                                   | Elutax SV (Aachen Resonance)                                                         | 2013  |
|                                                           |                            |                                                                                                                           |                                                   | Restore DEB (Cardionovum)                                                            | n.a.  |
|                                                           | Abd.                       | Drug-coated balloon catheter in abdominal vessels                                                                         | DCB-AV                                            | none (DCB with experimental drug coating)                                            | n.a.  |
|                                                           | Peripheral                 | Flow-diverter (Hemodynamically effective implant for endovascular treatment of peripheral aneurysms) in upper leg vessels | FD-ULV                                            | Peripheral Multilayer Flow Modulator (Cardiatis SA)                                  | 2009  |
|                                                           |                            | Drug-coated balloon catheter in upper leg vessels                                                                         | DCB-ULV                                           | SeQuent Please OTW (B.Braun Melsungen)                                               | 2009  |
|                                                           |                            |                                                                                                                           |                                                   | IN.PACT Admiral (Medtronic/Invatec)                                                  | 2010  |
|                                                           |                            |                                                                                                                           |                                                   | Advance PTX (Cook Medical)                                                           | 2011  |
|                                                           |                            |                                                                                                                           |                                                   | Cotavance Balloon (Medrad/Bayer)                                                     | 2011  |
| Legflow RX/OTW (Cardinovum)                               |                            |                                                                                                                           |                                                   | 2011                                                                                 |       |
| Lutonix (CR Bard)                                         |                            |                                                                                                                           |                                                   | 2012                                                                                 |       |
| Elutax SV (Aachen Resonances/Abmedica)                    |                            |                                                                                                                           |                                                   | 2013                                                                                 |       |
| Ranger (Boston Scientific)                                |                            |                                                                                                                           |                                                   | 2014                                                                                 |       |
| Luminor (iVascular)                                       |                            |                                                                                                                           |                                                   | 2016                                                                                 |       |
| FREEWAY (Eurocor)                                         |                            |                                                                                                                           |                                                   | 2016                                                                                 |       |
| Stellarex (Covidien/ Spectranetics/ Philips)              |                            | 2016                                                                                                                      |                                                   |                                                                                      |       |
| Passeo-18 Lux (Biotronik)                                 |                            | 2016                                                                                                                      |                                                   |                                                                                      |       |
| Implantation of a drug-eluting stent in upper leg vessels |                            | DES-ULV                                                                                                                   | Zilver PTX (Cook Medical)                         | 2009                                                                                 |       |
|                                                           | Eluvia (Boston Scientific) |                                                                                                                           | 2016                                              |                                                                                      |       |
| Drug-coated balloon catheter in lower leg vessels         | DCB-LLV                    | Legflow RX/OTW (Cardinovum)                                                                                               | 2011                                              |                                                                                      |       |
|                                                           |                            | Agent Drug-Coated Balloon (Boston Scientific)                                                                             | 2014                                              |                                                                                      |       |



| Table 1 .2 Technologies in sample by anatomical region |                                                        |                                                                 |                |                                                     |         |
|--------------------------------------------------------|--------------------------------------------------------|-----------------------------------------------------------------|----------------|-----------------------------------------------------|---------|
| Anatomical regions of procedures                       |                                                        | Procedure                                                       | Abb            | Product (Manufacturer)                              | CE-Mark |
|                                                        |                                                        |                                                                 |                |                                                     | year    |
|                                                        |                                                        | Implantation of a drug-eluting stent in lower leg vessels       | DES-LLV        | none (DES for coronary vessels)                     | n.a.    |
| Urinary system                                         |                                                        | Adjustable continence therapy                                   | ACT            | ACT/ProACT (Uromedica)                              | 2002    |
|                                                        | Fluorescence-assisted transurethral resection          | F-TUR                                                           |                | 5-Aminolevulinic acid, Levulan (DUSA Pharm.)        | 1990s** |
|                                                        |                                                        |                                                                 |                | KarlStorz D-Light C PDD System                      | 1998    |
|                                                        |                                                        |                                                                 |                | Hexaminolevulinate, Hexvix® (Photocure)             | 2005    |
|                                                        | Anticoagulation with citrate during dialysis           | ACD                                                             | Sodium Citrate | 1990s**                                             |         |
| Dialysis with high cut-off dialysis (HCO) membrane     | HCO                                                    | HCO-Membrane Gambro Theralite (Gambro Dialysatoren, now Baxter) | 2007           |                                                     |         |
| Antineoplastic                                         | Drug-eluting beads for transarterial chemoembolization | DEB-TACE                                                        |                | DC Beads (Biocompatibles UK, now Boston Scientific) | 2003    |
|                                                        |                                                        |                                                                 |                | HepaSphere (Merit Medical)                          | 2007    |
|                                                        |                                                        |                                                                 |                | Embozene Tandem (Boston Scientific)                 | 2012    |
|                                                        |                                                        |                                                                 |                | LifePearl (Terumo)                                  | 2015    |
|                                                        |                                                        |                                                                 |                | DC Beads Lumi (Boston Scientific)                   | 2017    |

**Notes:** \* approval year of the first product variation; \*\* exact year of approval not available;

**Abbreviations:** Abd – abdominal; DCB – drug coated balloons; DES – drug eluting stents; PDD - photodynamic diagnostics; UK – United Kingdom

**Source:** Compiled by the authors based on different sources

## Appendix 2: Searched sources for evidence

Table 2.1 Sources of evidence

| Sources of information used in the search for evidence                                                                                                                                                                                                                                                                                                                                                          | Date of the search                |
|-----------------------------------------------------------------------------------------------------------------------------------------------------------------------------------------------------------------------------------------------------------------------------------------------------------------------------------------------------------------------------------------------------------------|-----------------------------------|
| <b>Databases</b>                                                                                                                                                                                                                                                                                                                                                                                                |                                   |
| PubMed (via PubMed)                                                                                                                                                                                                                                                                                                                                                                                             | May 2019 (with single exclusions) |
| Ovid MEDLINE(R) ALL 1946 to May 2019                                                                                                                                                                                                                                                                                                                                                                            |                                   |
| Embase 1980 to 2019 May (via Ovid)                                                                                                                                                                                                                                                                                                                                                                              |                                   |
| Cochrane Library (Cochrane Reviews, Trials)                                                                                                                                                                                                                                                                                                                                                                     |                                   |
| <b>HTA</b>                                                                                                                                                                                                                                                                                                                                                                                                      |                                   |
| LBI-HTA ( <a href="http://eprints.hta.lbg.ac.at/">http://eprints.hta.lbg.ac.at/</a> )                                                                                                                                                                                                                                                                                                                           | Apr-May 2019                      |
| IQWiG ( <a href="https://www.iqwig.de/de/projekte-ergebnisse/publikationen/iqwig-berichte.1071.html">https://www.iqwig.de/de/projekte-ergebnisse/publikationen/iqwig-berichte.1071.html</a> )                                                                                                                                                                                                                   | Mar 2019                          |
| DIMDI-DAHTA ( <a href="https://www.dimdi.de/dynamic/de/weitere-fachdienste/health-technology-assessment/">https://www.dimdi.de/dynamic/de/weitere-fachdienste/health-technology-assessment/</a> )                                                                                                                                                                                                               | Mar 2019                          |
| CRD/INAHTA ( <a href="https://www.crd.york.ac.uk/CRDWeb/">https://www.crd.york.ac.uk/CRDWeb/</a> )                                                                                                                                                                                                                                                                                                              | Apr-Jun 2019                      |
| EUnetHTA ( <a href="https://www.eunethta.eu/assessment-archive-2006-2015/">https://www.eunethta.eu/assessment-archive-2006-2015/</a> ; <a href="https://www.eunethta.eu/rapid-reas/">https://www.eunethta.eu/rapid-reas/</a> )                                                                                                                                                                                  | Apr 19                            |
| Gemeinsamer Bundesausschuss (G-BA) ( <a href="https://www.g-ba.de/beschluesse">https://www.g-ba.de/beschluesse</a> )                                                                                                                                                                                                                                                                                            | Sep 19                            |
| Publicly available MDS reports (Google)                                                                                                                                                                                                                                                                                                                                                                         | Sep 19                            |
| <b>Clinical trial registries</b>                                                                                                                                                                                                                                                                                                                                                                                |                                   |
| International clinical trials registry platform ( <a href="http://apps.who.int/trialsearch/">http://apps.who.int/trialsearch/</a> )                                                                                                                                                                                                                                                                             | 2019-2020                         |
| ClinicalTrials.gov ( <a href="https://clinicaltrials.gov/">https://clinicaltrials.gov/</a> )                                                                                                                                                                                                                                                                                                                    |                                   |
| <b>Clinical guidelines</b>                                                                                                                                                                                                                                                                                                                                                                                      |                                   |
| AWMF ( <a href="https://www.awmf.org/leitlinien/aktuelle-leitlinien.html">https://www.awmf.org/leitlinien/aktuelle-leitlinien.html</a> )                                                                                                                                                                                                                                                                        | Apr 19                            |
| European Society of Cardiology (ESC) ( <a href="https://www.escardio.org/Guidelines">https://www.escardio.org/Guidelines</a> )                                                                                                                                                                                                                                                                                  | Jul-Aug 2019                      |
| European Society of Thoracic Surgeons (ESTS) ( <a href="http://www.ests.org/guidelines_and_evidence/guideline_database.aspx">http://www.ests.org/guidelines_and_evidence/guideline_database.aspx</a> )                                                                                                                                                                                                          |                                   |
| European Association of Urology (EAU) ( <a href="https://uroweb.org/individual-guidelines/oncology-guidelines/">https://uroweb.org/individual-guidelines/oncology-guidelines/</a> )                                                                                                                                                                                                                             |                                   |
| European Society of Minimally Invasive Neurological Therapy (ESMINT) ( <a href="https://www.esmint.eu/">https://www.esmint.eu/</a> )                                                                                                                                                                                                                                                                            |                                   |
| European Society for Medical Oncology (ESMO) ( <a href="https://www.esmo.org/Guidelines">https://www.esmo.org/Guidelines</a> )                                                                                                                                                                                                                                                                                  |                                   |
| European Society for Vascular Surgery (ESVS) ( <a href="http://www.esvs.org/journal/guidelines/">http://www.esvs.org/journal/guidelines/</a> )                                                                                                                                                                                                                                                                  |                                   |
| European Society for Vascular Medicine (ESVM) ( <a href="http://vascular-medicine.org/guidelines/">http://vascular-medicine.org/guidelines/</a> )                                                                                                                                                                                                                                                               |                                   |
| European Academy of Neurology (EAN) ( <a href="https://www.ean.org/Neurology-Guidelines.2680.0.html">https://www.ean.org/Neurology-Guidelines.2680.0.html</a> )                                                                                                                                                                                                                                                 |                                   |
| European Respiratory Society (ERS) ( <a href="https://www.ers-education.org/guidelines.aspx">https://www.ers-education.org/guidelines.aspx</a> )                                                                                                                                                                                                                                                                |                                   |
| European Stroke Organisation (ESO) ( <a href="https://eso-stroke.org/guidelines/eso-guideline-directory/#acute-stroke">https://eso-stroke.org/guidelines/eso-guideline-directory/#acute-stroke</a> )                                                                                                                                                                                                            |                                   |
| <b>Safety notifications</b>                                                                                                                                                                                                                                                                                                                                                                                     |                                   |
| Bundesinstitut für Arzneimittel und Medizinprodukte (BfArM) ( <a href="https://www.bfarm.de/">https://www.bfarm.de/</a> )                                                                                                                                                                                                                                                                                       | 2019-2020                         |
| The Implant Files ( <a href="https://medicaldevices.icij.org/">https://medicaldevices.icij.org/</a> )                                                                                                                                                                                                                                                                                                           | (2021*)                           |
| <b>Information on funding</b>                                                                                                                                                                                                                                                                                                                                                                                   |                                   |
| <b>Diagnosis-related groups (DRG) and supplementary payments in 2005-2017</b> retrieved from <a href="https://www.g-drg.de/Archiv">https://www.g-drg.de/Archiv</a> : DRG classification 2005 to DRG classification „ <b>Neue Untersuchungs- und Behandlungsmethoden</b> “ (NUB), lists from 2005-2017 retrieved from <a href="https://www.g-drg.de/Archiv">https://www.g-drg.de/Archiv</a> : §6 Abs. 2 KHEntgG) | Jul-Aug 2019                      |

Source: Compiled by the authors; Notes: \*last search was conducted in 2021.

## Appendix 3: Inclusion criteria of publications

General inclusion criteria of publications applied in systematic literature search and selection are presented in table 2.2. We included publications:

- of human studies investigating the selected technology as intervention or comparator for the indication described by procedure codes
- of primary and secondary studies with level of evidence (LoE) 1 to 4 followed to definition of 2. chapter §11 (3) by proceedings rules of the *G-BA* [4, 5] and described below
- published as a journal article or as grey literature two years before the documentation of the first hospital utilization (at the earliest in 2003) and up to 2017 with available full text
- in English or German language.

No strict limitations were specified for the comparator intervention and endpoints. Studies reporting only cost data, with no possibility for inference of the benefit of a technology, were excluded. To ensure consistency to the utilization curves, we introduced a 10% rule: Studies were included into the analysis if the proportion of patients with deviation from the intended intervention in one study arm did not exceed 10 %. Based on the assumption that every type of a study could have influenced the utilization, comparative studies that investigated different versions of the same product under the same technology would not be excluded but included as a non-comparative (LoE 4) study. The general inclusion and exclusion criteria were adjusted and clarified during the processing of the first few technologies. The technology specific inclusion and exclusion criteria are available upon request.

For systematic reviews and meta-analyses, it was required that the publication identifies oneself in the title, abstract, introduction or methods as a systematic review or Meta-analysis and the methodology was sufficiently described to demonstrate a systematic approach, i.e., methods of literature search and selection were reported.

Health technology assessment (HTA) reports were included only if they explicitly investigated the benefit of one of the technologies in sample. No strict limitations were defined with regard to comparative interventions.

Clinical guidelines were included if they were published by national (Germany, Austria, Switzerland) and supranational professional societies between 2005 and 2017 and contained specific recommendations for or against the use of the technology in sample (see table 2.1 for sources of information).

Table 3.1 General inclusion and exclusion criteria<sup>1</sup>

| <i>pico</i>  | <i>Inclusion criteria</i> <sup>2</sup>                                                                                                                                                                                                                                                                                                                                                                                                                                                                                                                                                                                                                                                                                                                                                                                                                                                                                                                                                                                                                                                                                                                                                                                                                                                                                                                                                                                                                                                                                                                                                                                                                                                                        | <i>Exclusion criteria</i>                                                                                                                                                                                                                                                                                                                                                                                                                                                                                                                                                                                             |
|--------------|---------------------------------------------------------------------------------------------------------------------------------------------------------------------------------------------------------------------------------------------------------------------------------------------------------------------------------------------------------------------------------------------------------------------------------------------------------------------------------------------------------------------------------------------------------------------------------------------------------------------------------------------------------------------------------------------------------------------------------------------------------------------------------------------------------------------------------------------------------------------------------------------------------------------------------------------------------------------------------------------------------------------------------------------------------------------------------------------------------------------------------------------------------------------------------------------------------------------------------------------------------------------------------------------------------------------------------------------------------------------------------------------------------------------------------------------------------------------------------------------------------------------------------------------------------------------------------------------------------------------------------------------------------------------------------------------------------------|-----------------------------------------------------------------------------------------------------------------------------------------------------------------------------------------------------------------------------------------------------------------------------------------------------------------------------------------------------------------------------------------------------------------------------------------------------------------------------------------------------------------------------------------------------------------------------------------------------------------------|
| <b>P</b>     | <ul style="list-style-type: none"> <li>a) The population of interest (adults and/or children)</li> <li>b) Indication of interest</li> <li>c) Subgroups with the same indication</li> </ul>                                                                                                                                                                                                                                                                                                                                                                                                                                                                                                                                                                                                                                                                                                                                                                                                                                                                                                                                                                                                                                                                                                                                                                                                                                                                                                                                                                                                                                                                                                                    | <ul style="list-style-type: none"> <li>a) In-vitro; experimental models; animals</li> <li>b) Indication is not within the definition</li> <li>c) Subgroups of population after treatment (e.g., with complications)</li> </ul>                                                                                                                                                                                                                                                                                                                                                                                        |
| <b>I</b>     | <p>The main aim of the publication is to evaluate effects of the technology captured by the OPS (the intervention within the PICO of the publication is the technology of interest, in some cases the technology of interest can be a comparator)</p> <ul style="list-style-type: none"> <li>a) There should be at least one arm in the evaluation which include <b>only the</b> technology of interest with similar functionality and purpose AND the results are published (at least in forms of tables) <ul style="list-style-type: none"> <li>i. When there is a <b>small percentage (<math>\leq 10\%</math>)</b> of other products in the same arm, then include</li> <li>ii. When there is a <b>percentage <math>&gt; 10\%</math></b> of other products in the same arm AND the results are differentiated by included products, then include</li> <li>iii. When there are different technologies with different functionality and purpose, but which are parts of the same procedure, then include</li> </ul> </li> <li>b) Include if the study compares two variants of the same product of the same manufacturer and <b>change LoE to IV</b> (case series) – e.g., <ul style="list-style-type: none"> <li>i. Comparison of two stents with different size within the same product and <b>same manufacturer</b> – 20mm vs. 40mm stent</li> </ul> </li> <li>c) Include if the study compares two <b>different</b> products within one technology (<b>keep initial LoE</b>) – e.g., <ul style="list-style-type: none"> <li>i. Two products (stent, valve, etc.) of <b>different manufacturers</b></li> <li>ii. Two products (stent, valves etc.) of the <b>same manufacturer</b></li> </ul> </li> </ul> | <ul style="list-style-type: none"> <li>d) The intervention within the <u>PICO of the publication</u> is not of interest <ul style="list-style-type: none"> <li>i. Imaging studies (with the comparison of two or more imagining modalities)</li> </ul> </li> <li>e) In the methods, there is a notice on the permission to use more than one product AND the percentage of cases with the mix is not stated</li> </ul> <p>There is only one arm with the mix of technologies with similar functionality and purpose <math>&gt; 10\%</math> <b>AND the results are NOT differentiated by included technologies</b></p> |
| <b>C</b>     | <i>Not restricted</i>                                                                                                                                                                                                                                                                                                                                                                                                                                                                                                                                                                                                                                                                                                                                                                                                                                                                                                                                                                                                                                                                                                                                                                                                                                                                                                                                                                                                                                                                                                                                                                                                                                                                                         | -                                                                                                                                                                                                                                                                                                                                                                                                                                                                                                                                                                                                                     |
| <b>O</b>     | <i>Not restricted - Efficacy, effectiveness, safety, healthcare related quality of life, surrogate, other: learning effects</i>                                                                                                                                                                                                                                                                                                                                                                                                                                                                                                                                                                                                                                                                                                                                                                                                                                                                                                                                                                                                                                                                                                                                                                                                                                                                                                                                                                                                                                                                                                                                                                               | <i>costs if no other endpoints are considered</i>                                                                                                                                                                                                                                                                                                                                                                                                                                                                                                                                                                     |
| <b>T</b>     | <i>from the year with the first hospital case minus 2 years, until to date</i>                                                                                                                                                                                                                                                                                                                                                                                                                                                                                                                                                                                                                                                                                                                                                                                                                                                                                                                                                                                                                                                                                                                                                                                                                                                                                                                                                                                                                                                                                                                                                                                                                                | <i>until the year with the first hospital case minus 2 years</i>                                                                                                                                                                                                                                                                                                                                                                                                                                                                                                                                                      |
| <b>S</b>     | <i>Primary and secondary studies: interventional and observational studies (e.g., studies based on registry data), reviews, systematic reviews, meta-analyses, guidelines, HTAs</i>                                                                                                                                                                                                                                                                                                                                                                                                                                                                                                                                                                                                                                                                                                                                                                                                                                                                                                                                                                                                                                                                                                                                                                                                                                                                                                                                                                                                                                                                                                                           | <i>Cost-effectiveness models, protocols, conference abstracts, editorials, Letter to the Editor, commentary, opinions, errata, notes, technical descriptions</i>                                                                                                                                                                                                                                                                                                                                                                                                                                                      |
| <b>Other</b> | <i>Language: German, English<br/>Full text available<br/>Results of the study are published</i>                                                                                                                                                                                                                                                                                                                                                                                                                                                                                                                                                                                                                                                                                                                                                                                                                                                                                                                                                                                                                                                                                                                                                                                                                                                                                                                                                                                                                                                                                                                                                                                                               | <i>Language: OTHER THAN German, English<br/>Full text NOT available<br/>Results NOT published</i>                                                                                                                                                                                                                                                                                                                                                                                                                                                                                                                     |

<sup>1</sup> The table was compiled by the authors<sup>2</sup> Technology specific inclusion criteria are available upon request.

Figure 3.1 Classification of evidence - excerpt of proceeding rules by G-BA 2. chapter § 11 (3) [4, 5]

**§ 11 Klassifizierung und Bewertung von Unterlagen**

(1) Die Auswertung der Unterlagen besteht aus einer Evidenzklassifizierung nach den Absätzen 2 bis 4 und einer Qualitätsbewertung nach den Absätzen 5 bis 7.

(2) Bei der Klassifizierung der Unterlagen zu diagnostischen Methoden gelten folgende Evidenzstufen:

- I a Systematische Übersichtsarbeiten von Studien der Evidenzstufe I b
- I b Randomisierte kontrollierte Studien
- I c Andere Interventionsstudien
- II a Systematische Übersichtsarbeiten von Studien zur diagnostischen Testgenauigkeit der Evidenzstufe II b
- II b Querschnitts- und Kohortenstudien, aus denen sich alle diagnostischen Kenngrößen zur Testgenauigkeit (Sensitivität und Spezifität, Wahrscheinlichkeitsverhältnisse, positiver und negativer prädiktiver Wert) berechnen lassen
- III Andere Studien, aus denen sich die diagnostischen Kenngrößen zur Testgenauigkeit (Sensitivität und Spezifität, Wahrscheinlichkeitsverhältnisse) berechnen lassen
- IV Assoziationsbeobachtungen, pathophysiologische Überlegungen, deskriptive Darstellungen, Einzelfallberichte, u. ä.; nicht mit Studien belegte Meinungen anerkannter Expertinnen und Experten, Berichte von Expertenkomitees und Konsensuskonferenzen

(3) Bei der Klassifizierung der Unterlagen zu therapeutischen Methoden gelten folgende Evidenzstufen:

- I a Systematische Übersichtsarbeiten von Studien der Evidenzstufe I b
- I b Randomisierte klinische Studien
- II a Systematische Übersichtsarbeiten von Studien der Evidenzstufe II b

39

Verfahrensordnung Stand: 6. Juli 2018

- 
- II b Prospektive vergleichende Kohortenstudien
  - III Retrospektive vergleichende Studien
  - IV Fallserien und andere nicht vergleichende Studien
  - V Assoziationsbeobachtungen, pathophysiologische Überlegungen, deskriptive Darstellungen, Einzelfallberichte, u. ä.; nicht mit Studien belegte Meinungen anerkannter Expertinnen und Experten, Berichte von Expertenkomitees und Konsensuskonferenzen

## Appendix 4: Screening of records obtained from registries

The results of the searches via the WHO interface and in the Clinicaltrials.gov database were extracted into Excel spreadsheets. They were then screened based on the PICO aspects using the inclusion and exclusion criteria described above and compared with studies already identified and included via the database search with regard to relevance and availability of publications. The following algorithm was applied in the screening for eligibility of the identified records:

### Screening algorithm for eligibility

- a) **Screening of the (1) intervention AND (2) condition AND (3) title AND (4) registry entry of the trial for eligibility**
  - i. If not relevant, document in a separate column at the beginning of the registry entry the number of the reason AND
  - ii. In a separate sheet the reason dedicated to the number documented in the initial table
  - iii. Mark the font of the letters of the excluded entry **dark grey**
- b) **Screening of the registry entry with available publications for relevance**
  - i. screening of the publication with the protocol for eligibility of the study; if such publication is not available, one of publications with results

### Filter of title AND study design for identification of RCTs

- c) Filter the title AND intervention of the entry for „random“ or „RCT“
  - i. Mark identified entries **yellow** (the whole row)
  - ii. **if publications available:** Download all publications and save in a folder with the number of the registry entry AND mark the NUMBER of the entry with available publications **green**
  - iii. **In no publications available:** mark the NUMBER of the entry without available publications **red**

Identified records of RCTs with the start date before 2017 with and without a publication were compared with publications on RCTs identified through database searches. RCTs with a registry entry but without any publication were also documented. RCTs or registry studies from 2017 on were counted and the number documented - RCTs and registry studies were documented separately.

## Appendix 5: Data extraction

Data on included studies was extracted per publication of LoE 1-4 studies and technology using a standardized extraction sheet in Excel. Relevant endpoints were defined before the extraction. During the extraction, it was noted if results of relevant endpoint were reported. The actual results were not extracted. Tables 5.1 to 5.3 provide information on extracted variables per technology and type of research (individual study – table 5.1, systematic review/meta-analysis/HTA – table 5.2, clinical guideline – table 5.3). The following algorithms were applied in the decision on the type of LoE, study population, and follow-up:

- a) Level of evidence (LoE) [4]
  - a. if a study contains two arms and one of the arms includes a potentially concurrent technology, in this case the study is a comparative trial (e.g., stent + DEB vs DEB
  - b. if a study contains two arms but the comparator is a variation of the same product (20mm Stent vs 40mm Stent) than the study is a non-comparative LoE IV study.
- b) Study population at the beginning of the study (Intervention vs. Control group): total number of study participants; number of study participants per group [intervention vs. control group]
- c) Median Follow-up (if available, otherwise follow-up of the publication; in months) – number of study participants at follow-up
- d) Follow-up-rate (at time point x: number & percent; IF AVAILABLE: Intention to Treat (ITT): number & per cent; Per-Protocol-Analysis (PPA): number & per cent)

### **The evaluation of results is based on conclusions from the abstract and from the text**

- e) If no conclusion in text is available, summary of results from the discussion section was extracted

The extraction of recommendations from guidelines was conducted using a simplified extraction sheet in Word. The extraction was performed by one researcher. Any uncertainties were discussed and consented in the working group.

Table 5.1 Extracted information per publication (individual study)

| <b>Extracted information per publication (individual study)</b>                                                            |
|----------------------------------------------------------------------------------------------------------------------------|
| <b>Reference &amp; date</b>                                                                                                |
| Author (year)                                                                                                              |
| Year of first (online) publication                                                                                         |
| For comparative studies: date of final publication in journal                                                              |
| <b>Information on topic &amp; study design</b>                                                                             |
| Study acronym, if available                                                                                                |
| Products/technologies (manufacturer) in the intervention arm                                                               |
| Products/technologies (manufacturer) in the comparison arm, if available                                                   |
| Level of evidence (LoE)                                                                                                    |
| <b>Study population &amp; Follow-up</b>                                                                                    |
| Number of patients at baseline (separately for intervention and comparison arms, if available)                             |
| Average duration of observation/follow-up in publication in months (with a note, if planned follow-up in study was longer) |
| Number of patients at the end of the observation period (if relevant)                                                      |
| Follow-up rate (if relevant)                                                                                               |
| <b>Notice if endpoints are reported (pre-determined per technology)</b>                                                    |
| Mortality                                                                                                                  |
| Adverse events (safety)                                                                                                    |
| Morbidity (method-specific)                                                                                                |
| Health related quality of life                                                                                             |
| Surrogate endpoints                                                                                                        |
| Other endpoints                                                                                                            |
| <b>Conclusions</b>                                                                                                         |
| Conclusion of the authors from the abstract                                                                                |
| Conclusion of the authors from the main text (or from the discussion if no conclusion was available as a section)          |
| <b>Source of funding for the study</b>                                                                                     |
| Source: Compiled by the authors                                                                                            |



Table 5.2 Extracted information per publication (systematic review, meta-analysis, HTA)

| <b>Extracted information per publication (systematic review - SR, meta-analysis - MA, HTA)</b>                                            |
|-------------------------------------------------------------------------------------------------------------------------------------------|
| <b>Reference &amp; date</b>                                                                                                               |
| Author (year)                                                                                                                             |
| Date of publication                                                                                                                       |
| <b>Information on topic &amp; study design</b>                                                                                            |
| Products/technologies (manufacturer) in the intervention arm AND Products/technologies (manufacturer) in the comparison arm, if available |
| Type of work (SR, MA, HTA)                                                                                                                |
| Number of included trials by level of evidence (LoE)                                                                                      |
| Listing of included randomized controlled trials (RCT, by acronym or reference)                                                           |
| Level of evidence (LoE) of the work (1a or 2a)                                                                                            |
| <b>Study population &amp; Follow-up</b>                                                                                                   |
| Minimum follow-up                                                                                                                         |
| Maximum follow-up                                                                                                                         |
| Number of patients included in all trials, per RCT, per technology                                                                        |
| <b>Notice if endpoints are reported (pre-determined per technology)</b>                                                                   |
| Mortality                                                                                                                                 |
| Adverse events (safety)                                                                                                                   |
| Morbidity (method-specific)                                                                                                               |
| Health related quality of life                                                                                                            |
| Surrogate endpoints                                                                                                                       |
| Other endpoints                                                                                                                           |
| <b>Conclusions</b>                                                                                                                        |
| Conclusion of the authors from the abstract                                                                                               |
| Conclusion of the authors from the main text (or from the discussion if no conclusion was available as a section)                         |

Source: Compiled by the authors

Table 5.3 Extracted information per guideline

| <b>Extracted information per guideline</b>                                                                               |
|--------------------------------------------------------------------------------------------------------------------------|
| <b>Reference &amp; Background</b>                                                                                        |
| Author (year)                                                                                                            |
| Guideline institution                                                                                                    |
| Country of the guideline                                                                                                 |
| Target group of the guideline                                                                                            |
| <b>Targeted technology</b>                                                                                               |
| Technology (products/manufacturers) from our sample identified in the guideline                                          |
| Indication                                                                                                               |
| <b>Recommendation</b>                                                                                                    |
| Level of Evidence (LoE)/Grade of Recommendation (GoR)/ Relationship between evidence and recommendation of the guideline |
| Recommendation                                                                                                           |

Source: Compiled by the authors

## Appendix 6: Risk of bias (RoB) assessment of RCTs

Risk of bias (RoB) assessment of identified randomized controlled trials (RCTs) was performed at study level based on the criteria of the FJC (p. 164ff, [4]) and methods of the Institute for Quality and Efficiency in Health Care (IQWiG) (p. 170ff [6]) and documented in a standardized Word table as presented in table 6.1. The FJC/IQWiG RoB criteria are in line with the Cochrane Collaboration RoB 1 criteria for RoB assessment at study level. The evaluation was performed by one person. In cases where the assessment criteria „adequate generation of the randomization sequence“ or „concealment of group allocation“ could be answered neither with „yes“ nor with „unclear“, the evidence level was downgraded from 1b to 2b. The quality of systematic reviews and HTAs was not assessed.

Table 6.1 Risk of bias (RoB) tool used for RoB assessment

| Trial   | Adequate generation of the randomization sequence | Concealment of the group allocation | Blinding       |                                           | Outcome-independent reporting of all relevant endpoints | Absence of other aspects | Potential risk of bias at study level |
|---------|---------------------------------------------------|-------------------------------------|----------------|-------------------------------------------|---------------------------------------------------------|--------------------------|---------------------------------------|
|         |                                                   |                                     | Patient/Person | Attending or referral physician/personnel |                                                         |                          |                                       |
| Trial X | yes/no/unsure                                     | yes/no/unsure                       | yes/no/unsure  | yes/no/unsure                             | yes/no/unsure                                           | yes/no                   | high/low                              |

Source: Based on [4–6]

## Appendix 7: Description of the regression model

### Description of the variable with weighted cumulative evidence – the “new variable”

The new variable  $X_{tj}$ , „results of available body of evidence” at year  $t$ , with  $t \in T$  representing the technology specific observation period  $T_j = \{= \min (t(\text{start}_j) - 2); \dots; 2017\}$ , which starts two years prior to the first procedure documentation of technology  $j$ , in year  $(t(\text{start}_j) - 2)$ , but at the earliest in 2003, and ends at the latest in 2017.  $j$  represents the specific technology  $j \in J$  with  $J = \{NUBs \text{ (see appendix 1, pp. 4 – 7)}\}$ . The new variable incorporates all identified comparative analyses (LoE 1-3) of a technology published up to and including year  $t$ , weighted by category of study results  $r \in R = \{\text{positive, negative, neutral}\}$  and LoE. The new variable  $X$  is described by the equation (1).

$$X_{tj} = \sum_{i=(t(\text{start}_j)-2)}^t w_{rl} x_{ijrl} \quad (1)$$

The variable was calculated based on LoE 1-3 studies, following the assumption that controlled designs can rather provide reasonably reliable insights on the effects of a technology and are therefore more likely to influence utilization. For example, a systematic review of RCTs (LoE 1a) with negative results was assigned a weight of „-6”, and a systematic review (LoE 1a) with positive results was assigned a weight of „+6”. A publication reporting no difference between the comparator technologies (categorized as „neutral”) received a weight of 1 independently of LoE. Inconclusive results and results of LoE 4 studies were not incorporated into the model. The weight  $w$  assigned to each category of study results and Level of Evidence ( $r, l$ ) combination are as follows:

- Systematic review of RCTs (LoE 1a) with negative results: -6
- Systematic review of RCTs (LoE 1a) with positive results: +6
- Randomized controlled trial (LoE 1b) with negative results: -5
- Randomized controlled trial (LoE 1b) with positive results: +5
- Systematic review of non- randomized controlled trials (LoE 2a) with negative results: -4
- Systematic review of non- randomized controlled trials (LoE 2a) with positive results: +4
- Non- randomized controlled trial (LoE 2b) with negative results: -3
- Non- randomized controlled trial (LoE 2b) with positive results: +3
- Retrospective controlled study (LoE 3) with negative results: -2
- Retrospective controlled study (LoE 3) with positive results: +2
- Publication reporting no difference between comparator technologies (neutral, LoE 1-3): 1

Three technologies – MVAC, DCB-AV and FD-ULV (for more information on the respective technologies, see appendix 1) – were not considered in the regression analysis since no publications of comparative studies were identified.

### Derivation of the regression model

$$Y_{tj} = \beta_{0j} + \beta_{1j}X_{1tj} + e_{tj} \quad (2)$$

$$\beta_{0j} = \gamma_{00} + \gamma_{01}Z_j + u_{0j} \quad (3)$$

$$\beta_{1j} = \gamma_{10} + \gamma_{11}Z_j + u_{1j} \quad (4)$$

$$Y_{tj} = \gamma_{00} + \gamma_{01}Z_j + \gamma_{11}X_{1tj}Z_j + \gamma_{10}X_{1tj} + u_{1j}X_{1tj} + u_{0j} + e_{tj} \quad (5)$$

$$\begin{aligned} \text{number of procedures}_{tj} &= \gamma_{00} + \gamma_{01} \text{technology}_j \\ &+ \gamma_{11} \text{results of available body of evidence}_{tj} \text{technology}_j \\ &+ \gamma_{10} \text{results of available body of evidence}_{tj} \\ &+ u_{1j} \text{results of available body of evidence}_{tj} + u_{0j} + e_{tj} \end{aligned} \quad (6)$$

As shown in equation 2,  $Y_{tj}$  denotes the predicted outcome variable *number of hospital procedures* of technology  $j \in J = \{NUBs \text{ (see appendix 1, pp. 4 – 7)}\}$ . in the year  $t \in T_j = \{2003 = \min(t(\text{start}_j) - 2); \dots; 2017\}$ ;  $\beta_{0j}$  denotes the technology-individual intercept (random intercept, equation 3); and  $\beta_{1tj}$  represents the random slope, which can vary across both technologies (j) and time points (t). This allows for the possibility of different slopes for each technology over time.  $\beta_{1j}$  also denotes the regression coefficient for the explanatory variable  $X_{ij} = \text{results of available body of evidence}$  for technology j in the year t (equation 4) that vary by the grouping variable  $Z = \text{technology}$ . Equations 3 and 4 are substitutes for  $\beta_{0j}$  and  $\beta_{1j}$  in equation 2 resulting in equation 5 and 6. The  $u_{0j}$  and  $u_{1j}$  are random residual error terms. The residual error term of the fixed effect  $e_{tj}$  is normally distributed around zero with variance  $\sigma_e^2$  [ $e_{tj} \sim N(0, \sigma_e^2)$ ] [7]. Residual terms  $u_j$  are independent from the error term  $e_{tj}$ . Model estimation was performed with RStudio (Version 1.4.1717) and lme4 package (analytic code is available upon request). The aim of the regression function is to estimate whether the development of utilization follows the direction of study results, but not to explain the whole variance; this would not be possible by including only one explanatory variable, and many of potential influencing factors [8] are difficult to quantify.

## Appendix 8: Results of the search for evidence per database and screening step

Table 8.1 Results of the search for evidence (individual studies, systematic review, meta-analysis, HTA)

| Technology  | MEDLINE (Ovid) |         | EMBASE (Ovid) |         | PubMed     |         | Cochrane Library |         | Total hits per technology |                         |     | Included after screening |           |     |                       |
|-------------|----------------|---------|---------------|---------|------------|---------|------------------|---------|---------------------------|-------------------------|-----|--------------------------|-----------|-----|-----------------------|
|             | Date           | Records | Date          | Records | Date       | Records | Date             | Records | Before duplicate removal  | After duplicate removal | HTA | Title/ Abstract          | Full text | HTA | Included for analysis |
| MT          | 18.05.2019     | 2971    | 18.05.2019    | 6719    | 24.05.2019 | 903     | 20.05.2019       | 701     | 11294                     | 7970                    | 48  | 1226                     | 189       | 5   | 194                   |
| DCB-AV      | 18.05.2019     | 2781    | 18.05.2019    | 6128    | 24.05.2019 | 598     | 20.05.2019       | 793     | 10300                     | 6548                    | 241 | 16                       | 2         | 0   | 2                     |
| DCB-CV      |                |         |               |         |            |         |                  |         |                           |                         |     | 593                      | 132       | 4   | 136                   |
| DCB-IV      |                |         |               |         |            |         |                  |         |                           |                         |     | 14                       | 4         | 0   | 4                     |
| DCB-LLV/ULV |                |         |               |         |            |         |                  |         |                           |                         |     | 419                      | 87        | 3   | 87                    |
| TAVI        | 20.05.2019     | 2034    | 20.05.2019    | 3898    | 24.05.2019 | 606     | 22.05.2019       | 894     | 7432                      | 5991                    | 179 | 1243                     | 492       | 6   | 498                   |
| PECLA/iLA   | 24.05.2019     | 1786    | 24.05.2019    | 3736    | 24.05.2019 | 388     | 21.05.2019       | 618     | 6528                      | 4668                    | 62  | 215                      | 34        | 1   | 35                    |
| FD-ULV      | 20.05.2019     | 1002    | 20.05.2019    | 1570    | 24.05.2019 | 170     | 22.05.2019       | 310     | 3052                      | 4014                    | 324 | 64                       | 7         | 0   | 7                     |
| DEB-TACE    | 18.05.2019     | 1281    | 18.05.2019    | 2977    | 24.05.2019 | 275     | 20.05.2019       | 761     | 5294                      | 3770                    | 55  | 1058                     | 151       | 0   | 151                   |
| EABO        | 19.05.2019     | 1107    | 19.05.2019    | 2371    | 24.05.2019 | 461     | 22.05.2019       | 412     | 4351                      | 3702                    | 248 | 109                      | 16        | 0   | 16                    |
| BVS         | 18.05.2019     | 1434    | 18.05.2019    | 2881    | 25.05.2019 | 280     | 21.05.2019       | 758     | 5353                      | 3403                    | 75  | 1007                     | 226       | 2   | 228                   |
| EL-P/ICD    | 17.05.2019     | 1264    | 17.05.2019    | 2440    | 24.05.2019 | 486     | 20.05.2019       | 288     | 4478                      | 3308                    | 57  | 432                      | 61        | 0   | 61                    |
| MVAC        | 03.10.2019     | 1520    | 03.10.2019    | 2883    | 03.10.2019 | 1671    | 03.10.2019       | 125     | 6199                      | 3191                    | 110 | 80                       | 10        | 2   | 10                    |
| F-TUR       | 18.05.2019     | 1732    | 18.05.2019    | 2864    | 24.05.2019 | 256     | 20.05.2019       | 183     | 5035                      | 3178                    | 24  | 407                      | 44        | 1   | 45                    |
| LVRC        | 19.05.2019     | 1255    | 19.05.2019    | 2339    | 25.05.2019 | 58      | 19.05.2019       | 329     | 3981                      | 2978                    | 9   | 196                      | 18        | 2   | 20                    |
| DES-LLV     | 18.05.2019     | 584     | 18.05.2019    | 1625    | 24.05.2019 | 192     | 22.05.2019       | 270     | 2671                      | 2372                    | 666 | 567                      | 43        | 4   | 47                    |
| DES- ULV    |                |         |               |         |            |         |                  |         |                           |                         |     | 53                       | 2         | 55  |                       |
| VAD         | 17.05.2019     | 782     | 11.06.2019    | 1917    | 24.05.2019 | 235     | 20.05.2019       | 251     | 3185                      | 2238                    | 24  | 644                      | 76        | 2   | 78                    |
| SE-BMS      | 18.05.2019     | 528     | 18.05.2019    | 1705    | 24.05.2019 | 73      | 21.05.2019       | 103     | 2409                      | 1916                    | 145 | 165                      | 15        | 0   | 15                    |
| ER-ABL      | 20.05.2019     | 356     | 20.05.2019    | 1214    | 24.05.2019 | 159     | 22.05.2019       | 409     | 2138                      | 1768                    | 98  | 167                      | 13        | 0   | 13                    |
| ACD         | 18.05.2019     | 548     | 18.05.2019    | 986     | 24.05.2019 | 77      | 20.05.2019       | 203     | 1814                      | 1150                    | 16  | 336                      | 86        | 0   | 86                    |
| ACT         | 18.05.2019     | 277     | 18.05.2019    | 789     | 25.05.2019 | 51      | 20.05.2019       | 116     | 1233                      | 894                     | 9   | 166                      | 29        | 1   | 30                    |
| IABC        | 22.05.2019     | 348     | 22.05.2019    | 635     | 25.05.2019 | 65      | 21.05.2019       | 169     | 1217                      | 779                     | 16  | 239                      | 27        | 0   | 27                    |
| HCO         | 22.05.2019     | 1043    | 22.05.2019    | 1768    | 24.05.2019 | 12      | 22.05.2019       | 392     | 3215                      | 2611                    | 25  | 187                      | 15        | 0   | 15                    |

Table 8.2 Results of the search for guidelines, HTA, safety notifications and in clinical trial registers

| Abbreviation of technologies (N=25) | Safety notifications (total) | At least one recall (total) | Safety notifications in Germany (DE) | At least one recall (DE) | Guidelines      | HTA                 | RCT (register) |
|-------------------------------------|------------------------------|-----------------------------|--------------------------------------|--------------------------|-----------------|---------------------|----------------|
| ACD                                 | 0                            |                             | 0                                    |                          | 1               | 0                   | 0              |
| ACT                                 | 0                            |                             | 0                                    |                          | 1               | 1                   | 0              |
| BVS                                 | 48                           | yes                         | 2                                    | no                       | 1               | 2                   | 10             |
| DCB-AV                              | 0                            |                             | 0                                    |                          | 2               | 0                   | 0              |
| DCB-CV                              | 0                            |                             | 0                                    |                          | 1               | 4                   | >1             |
| DCB-IV                              | 0                            |                             | 0                                    |                          | 1               | 0                   | 0              |
| DCB-LLV                             | 2                            | no                          | 0                                    |                          | 2 (DCB-ULV/LLV) | 2 (DCB-ULV/LLV = 3) | 2              |
| DCB-ULV                             | 26                           | yes                         | 7                                    | no                       | 2 (DCB-ULV/LLV) | 2 (DCB-ULV/LLV = 3) | >3             |
| DEB-TACE                            | 3                            | yes                         | 0                                    |                          | 1               | 0                   | 45             |
| DES-LLV                             | 20 (coronary stents)         | yes                         | 3 (coronary stents)                  | no                       | 1 (DES-LLV/ULV) | 4 (DES-LLV/ ULV =5) | 5              |
| DES-ULV                             | 13                           | yes                         | 3                                    | yes                      | 1 (DES-LLV/ULV) | 4 (DES-LLV/ ULV =5) | 19             |
| EABO                                | 38                           | yes                         | 5                                    | yes                      | 0               | 0                   | 0              |
| EL-P/ICD                            | 6                            | yes                         | 1                                    | yes                      | 0               | 0                   | 0              |
| ER-ABL                              | 0                            |                             | 0                                    |                          | 2               | 0                   | 0              |
| FD-ULV                              | 0                            |                             | 0                                    |                          | 0               | 0                   | 0              |
| F-TUR                               | 2                            | yes                         | 1                                    | no                       | 13              | 1                   | 6              |
| HCO                                 | 3                            | yes                         | 1                                    | yes                      | 2               | 0                   | 1              |
| IABC                                | 0                            |                             | 0                                    |                          | 0               | 0                   | 1              |
| LVRC                                | 0                            |                             | 0                                    |                          | 0               | 2                   | 2              |
| MT                                  | 10                           | yes                         | 2                                    | no                       | 2               | 5                   | 2              |
| MVAC                                | 0                            |                             | 0                                    |                          | 0               | 2                   | 2              |
| PECLA/iLA                           | 1                            | yes                         | 1                                    | yes                      | 2               | 1                   | 1              |
| pVAD                                | 4                            | yes                         | 3                                    | yes                      | 2               | 2                   | 9              |
| SE-BMS                              | 0                            |                             | 0                                    |                          | 1               | 0                   | 3              |
| TAVI                                | 74                           | yes                         | 12                                   | yes                      | 5               | 12                  | >1             |
| total                               |                              |                             |                                      |                          | 40              | 40                  |                |

Source: Compiled by the authors

### Appendix 9: Characteristics of included studies

The largest studies were identified for BVS and TAVI with 141.324 and 24.020 participants, respectively. At least one study with more than 1000 participants was identified for 12 out of the 25 technologies; these were most commonly retrospective registry studies (8/12 technologies), but also RCTs (BVS, TAVI), prospective non-randomized controlled trial (EABO) and case series (DCB-CV).

The longest follow-up was identified in studies of four technologies: with 118 months (ACT), followed by 108 months (DEB-TACE), 106 months (EABO) and 100 months (F-TUR). ACD is the only technology for which only studies focusing on periprocedural outcomes and short follow-up were identified.

Mortality, morbidity, and adverse events were assessed in many studies for all technologies except ACD, for which studies included only surrogate endpoints (and adverse events). Health related quality of life (HRQoL) was assessed in studies on 11 technologies, primarily on cardiovascular indications.

Figure 9.0.1 Randomized controlled trials and results of Risk of Bias (RoB) assessment

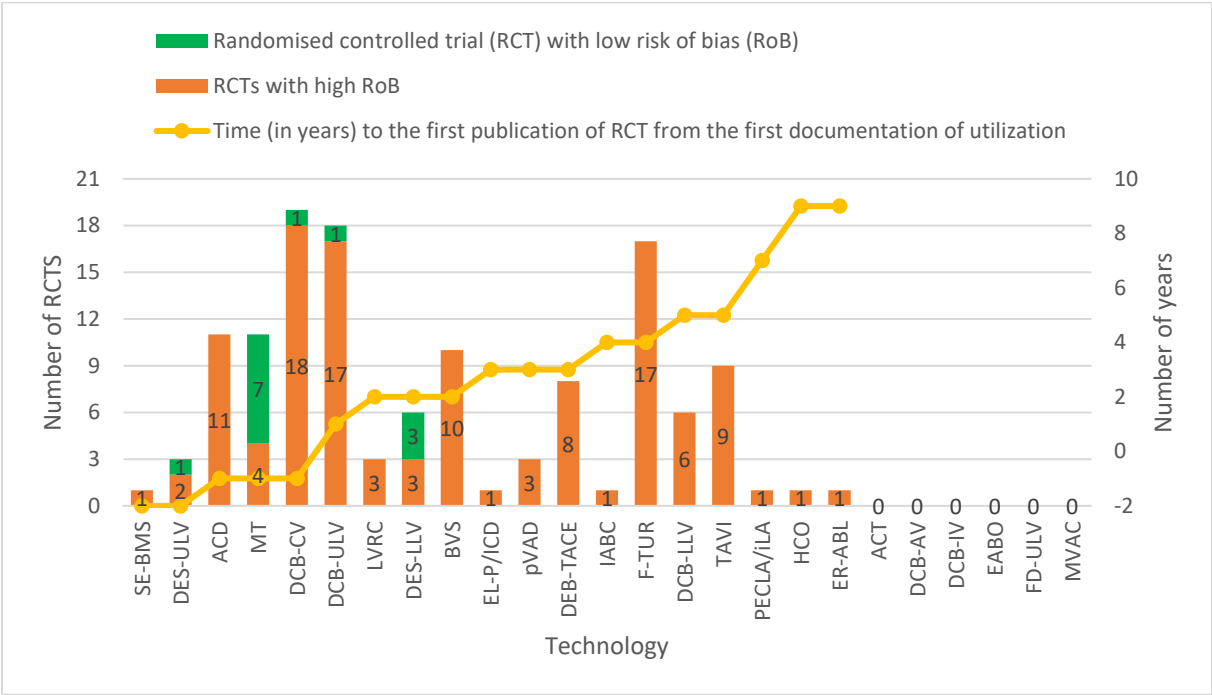

Source: Created by the authors

Table 9.1 Number of included publications with systematic reviews and randomized controlled trials

| Abbreviation of technologies (N=25) | Systematic reviews | RCT (Number of publications) |
|-------------------------------------|--------------------|------------------------------|
| ACD                                 | 3                  | 11                           |
| ACT                                 | 3                  | 0                            |
| BVS                                 | 26                 | 23                           |
| DCB-AV                              | 0                  | 0                            |
| DCB-CV                              | 10                 | 33                           |
| DCB-IV                              | 25                 | 0                            |
| DCB-LLV                             | 10                 | 7                            |
| DCB-ULV                             | 17                 | 22                           |
| DEB-TACE                            | 2                  | 9                            |
| DES-LLV                             | 13                 | 9                            |
| DES-ULV                             | 10                 | 4                            |
| EABO                                | 1                  | 0                            |
| EL-P/ICD                            | 0                  | 1                            |
| ER-ABL                              | 0                  | 1                            |
| FD-ULV                              | 0                  | 0                            |
| F-TUR                               | 10                 | 20                           |
| HCO                                 | 0                  | 1                            |
| IABC                                | 5                  | 2                            |
| LVRC                                | 3                  | 4                            |
| MT                                  | 24                 | 13                           |
| MVAC                                | 1                  | 0                            |
| PECLA/iLA                           | 8                  | 1                            |
| pVAD                                | 3                  | 10                           |
| SE-BMS                              | 0                  | 3                            |
| TAVI                                | 25                 | 39                           |
| total                               | 199                | 213                          |

Source: Compiled by the authors



## Appendix 10: Development of body of evidence

Figure 10.1 Evidence development: Share of publications of LoE 1-3 studies on all publications and its trend of grow by anatomical system and technology

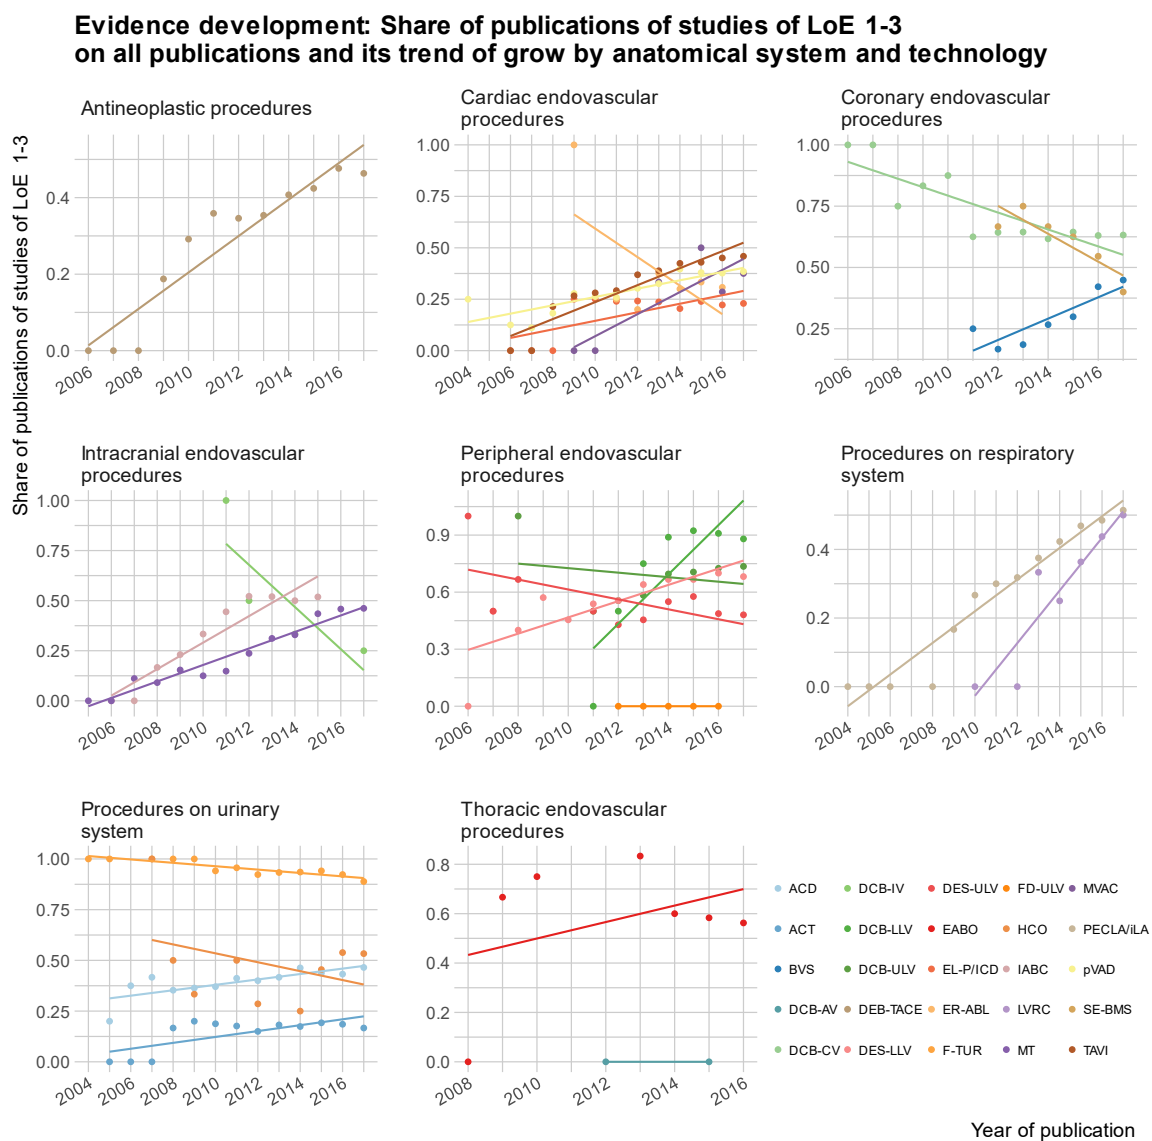

Source: Created by the authors

Figure 10.2 Evidence development: Increase of accumulated number of publications LoE 1-3 and LoE 4 studies by anatomic system and technology

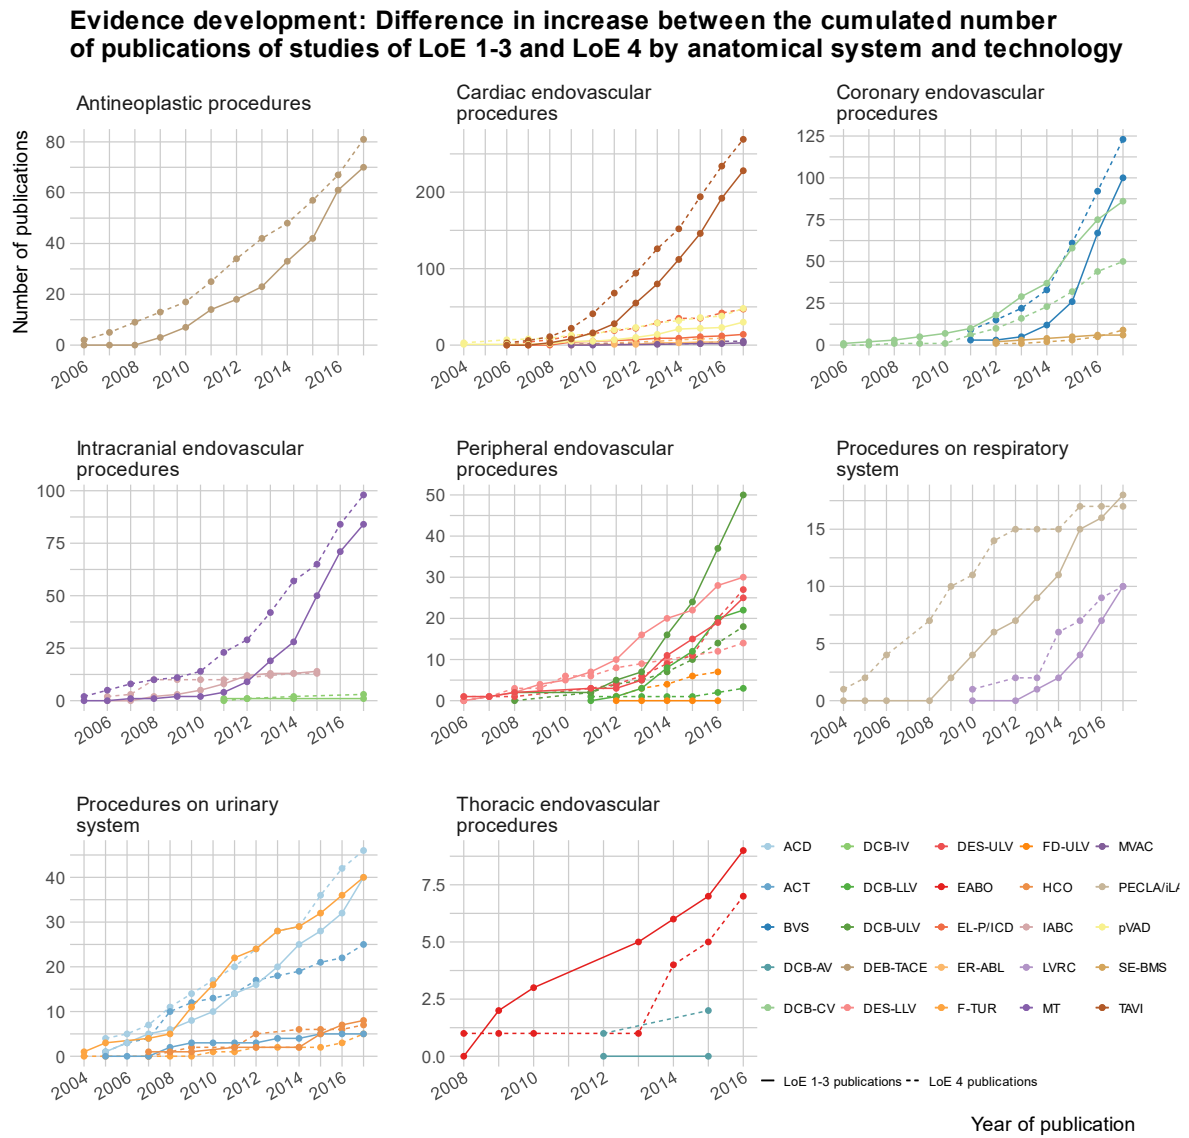

Source: Created by the authors

## Appendix 11: Results of evidence for technologies in sample

Figure 11.1 Negative or inconclusive results in publications by LoE and year of publication based on all technologies of sample

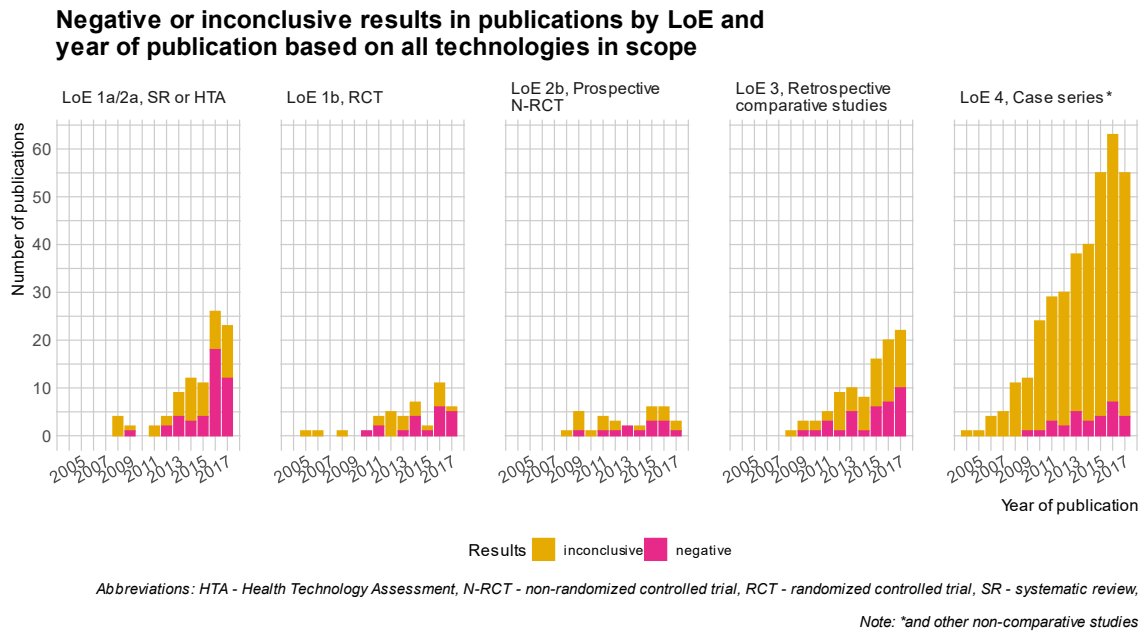

Source: Created by the authors

Figure 11.2 All categories of results in publications by LoE and year of publication based on all technologies of sample

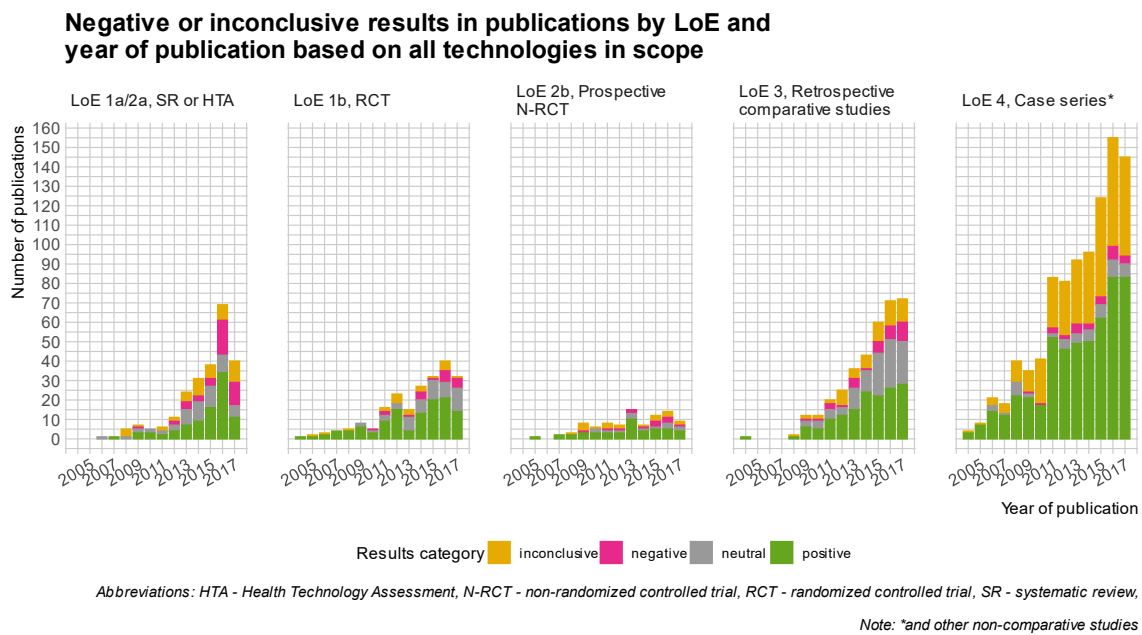

Source: Created by the authors

Figure 11.3 (A-C) Results in publications presented by LoE, year of publication and technology (by availability of negative results)

Source: Figures 11.3 (A-C) were created by the authors

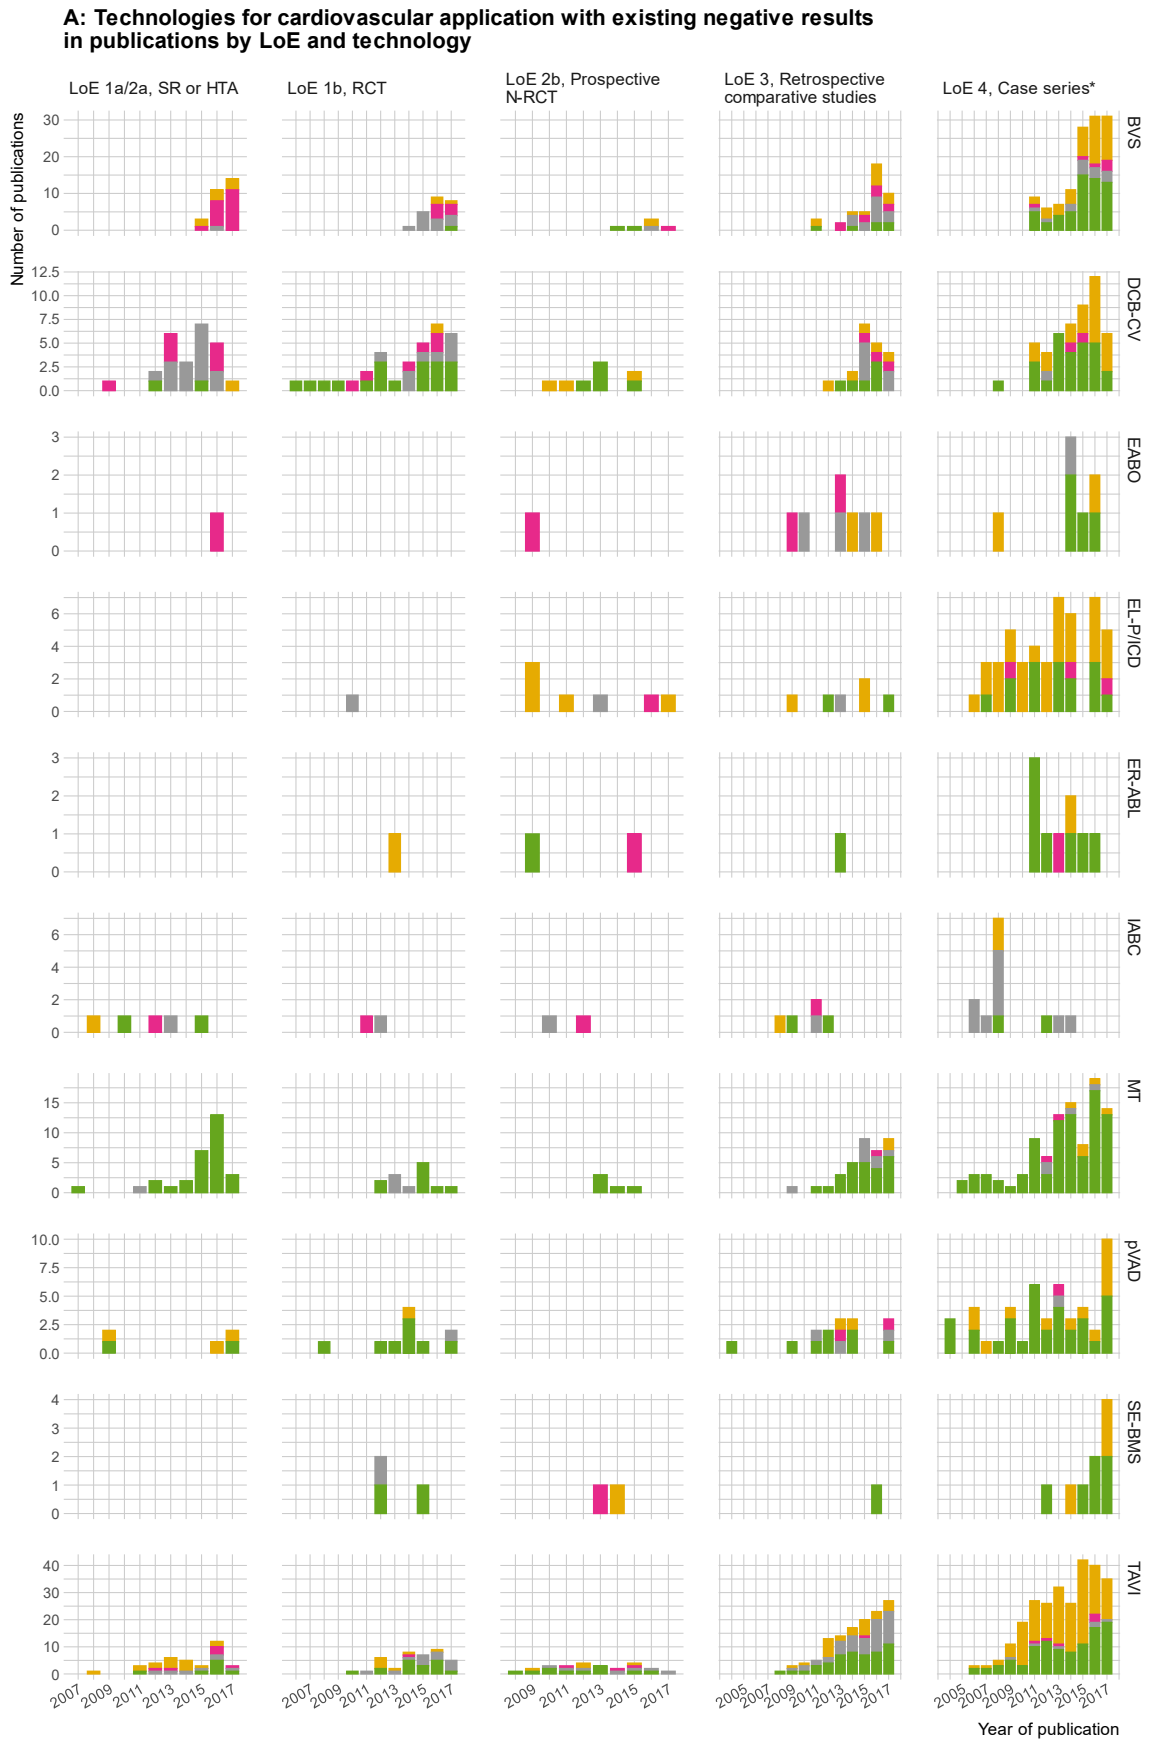

Abbreviations: HTA - Health Technology Assessment, N-RCT - non-randomized controlled trial, RCT - randomized controlled trial, SR - systematic review,

Note: \*and other non-comparative studies

**B: Technologies for application in peripheral vessels, urinary tract and other extracorporeal application with existing negative results in publications by LoE and technology**

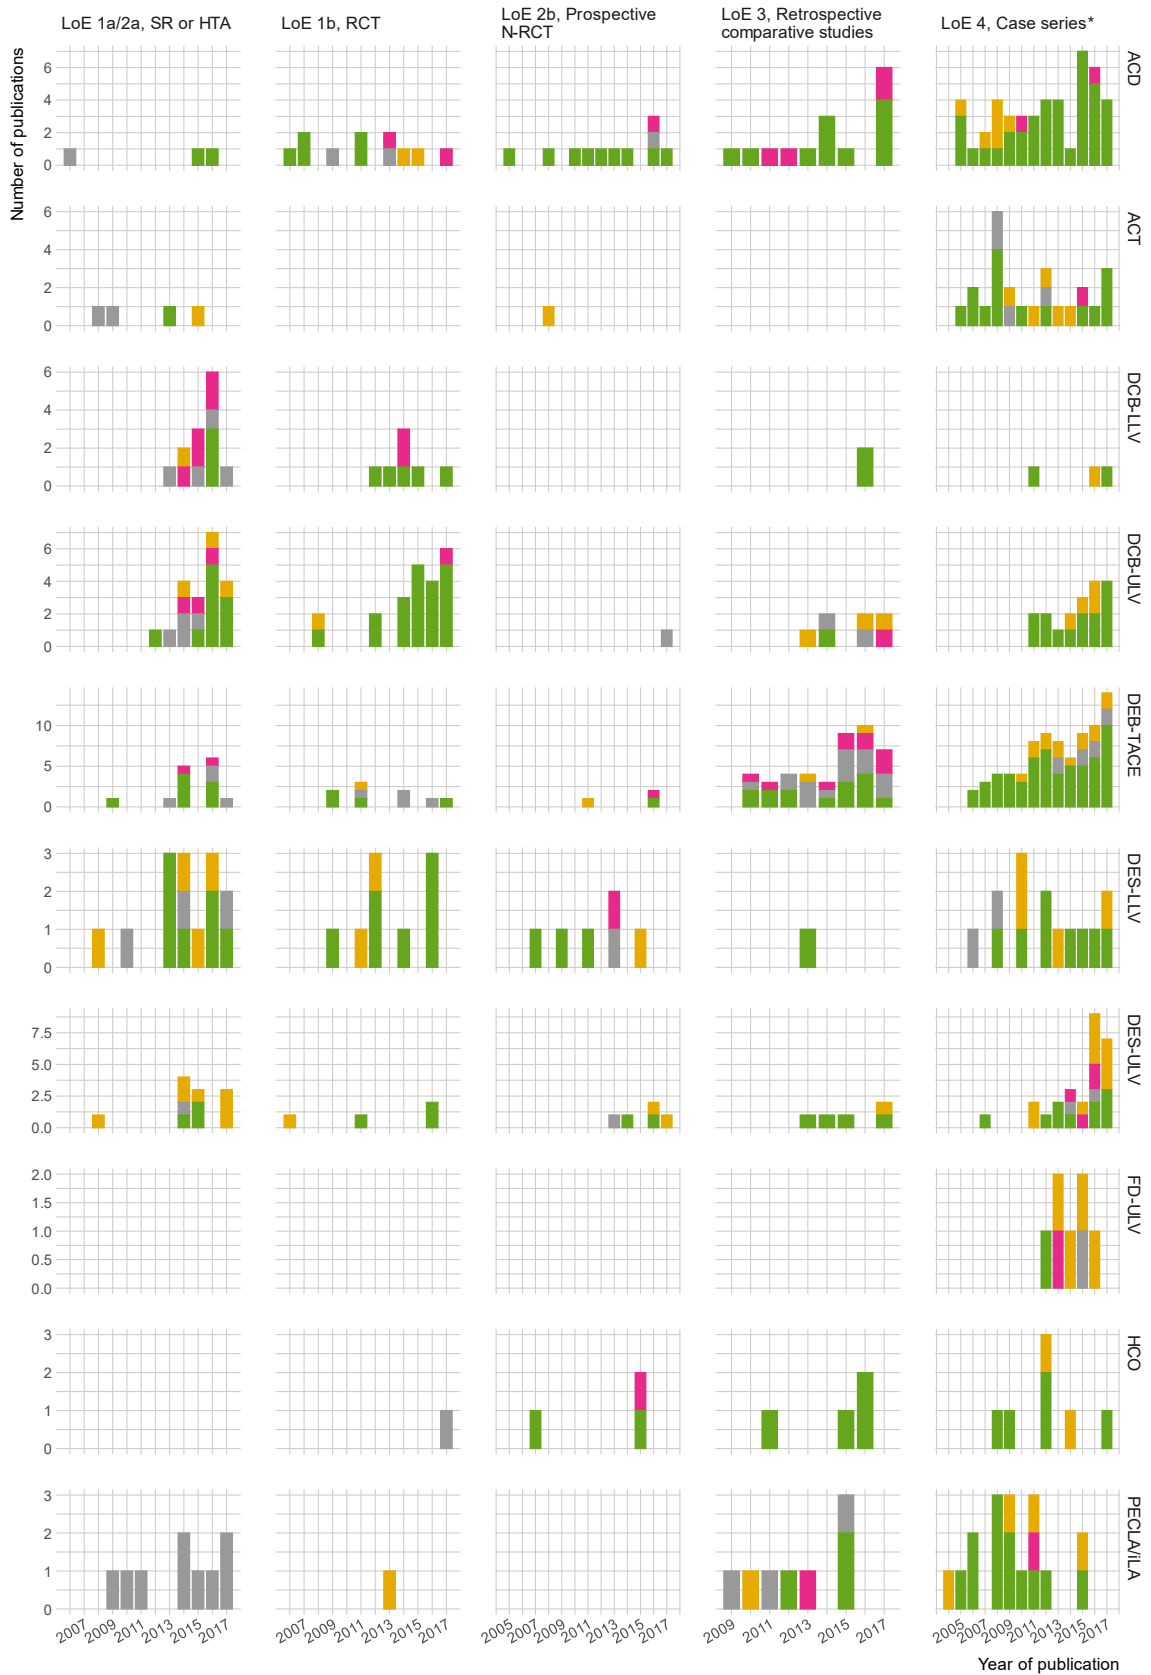

**Results category** ■ indecisive ■ negative ■ neutral ■ positive

Abbreviations: HTA - Health Technology Assessment, N-RCT - non-randomized controlled trial, RCT - randomized controlled trial, SR - systematic review,

Note: \*and other non-comparative studies

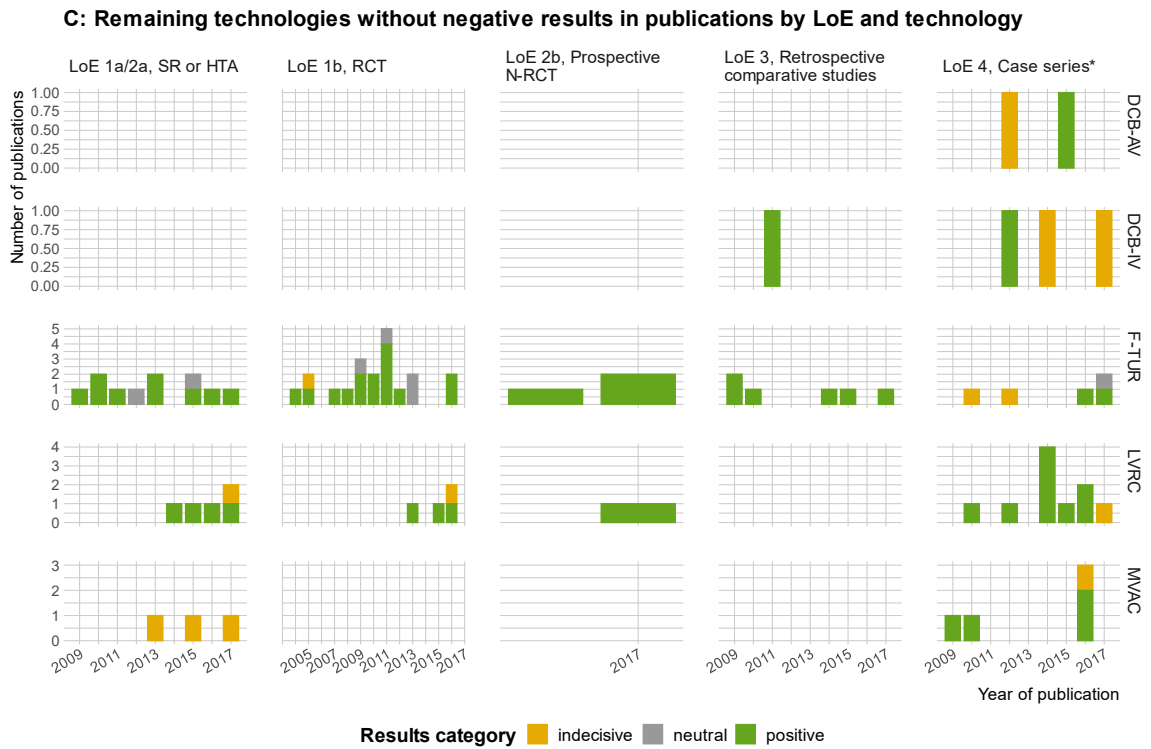

## Appendix 12: Recommendations from clinical guidelines

Positive recommendations were identified for 11 out of 19 technologies with available clinical guidelines, but are predominantly so-called „can“ recommendations, in which the use of a technology is supported under certain conditions (figure 12.1). For eight out of 19 technologies, guideline authors did either not recommend the technology for general use or found the technology inferior to standard care. For all but one technology with more than one available guideline update, these recommendations did not change considerably over time. For pVAD, the recommendation changed from „no recommendation for general use“ in 2010 [9] to a „can“ recommendation in 2017 [10]. Guideline recommendations do not contradict the prevailing body of evidence at the time of recommendation for any of the 19 technologies.

Figure 12.1 Recommendations from identified clinical guidelines

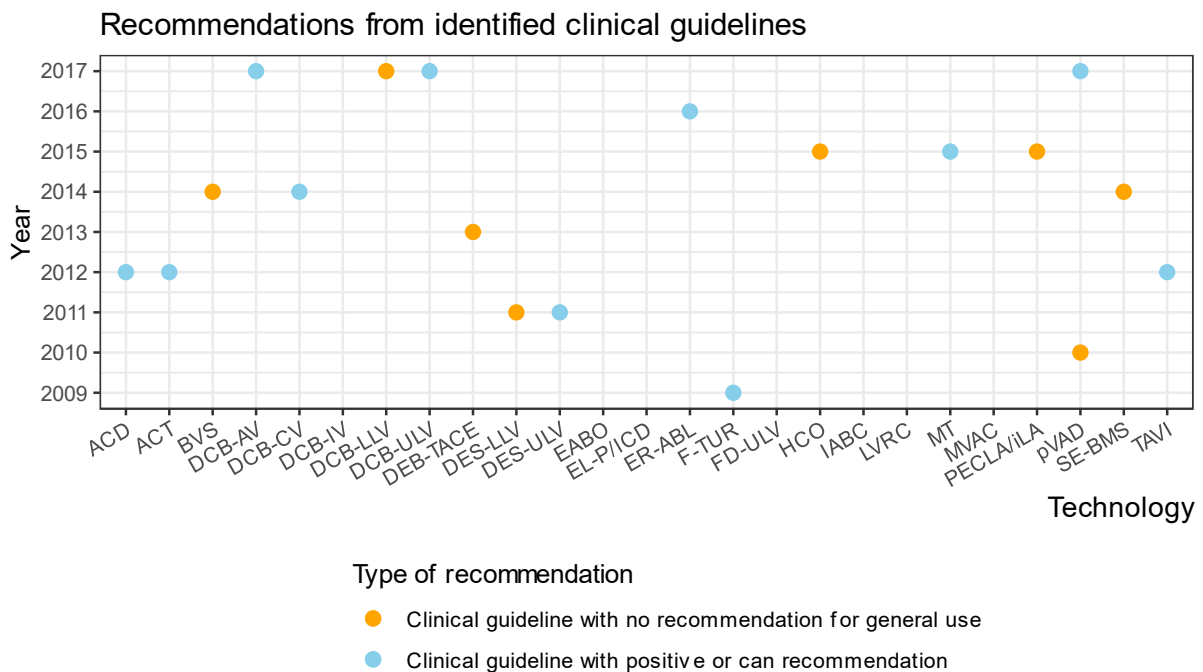

Source: Created by the authors



## Appendix 13: References

### References

1. Dreger M, Eckhardt H, Felgner S et al. (2021) Implementation of innovative medical technologies in German inpatient care: patterns of utilization and evidence development. *Implement Sci* 16:94. <https://doi.org/10.1186/s13012-021-01159-3>
2. Research Data Centre (RDC) of the Federal Statistical Office and Statistical Offices of the Federal States (2018) Hospital statistics based on diagnosis-related groups (DRG statistics), survey years 2005-2017, controlled remote data processing. RDC of the Federal Statistical Office and the statistical offices of the Länder (RDC)
3. Bundesinstitut für Arzneimittel und Medizinprodukte (2023) Code-Search in OPS online. [https://www.bfarm.de/EN/Code-systems/Classifications/OPS-ICHI/OPS/Code-search/\\_node.html](https://www.bfarm.de/EN/Code-systems/Classifications/OPS-ICHI/OPS/Code-search/_node.html). Accessed 16 Jun 2023
4. Gemeinsamer Bundesausschuss (2019) Verfahrensordnung (VerfO) des Gemeinsamen Bundesausschusses (G-BA) in der Version vom 06.03.2019: in der Fassung vom 18. Dezember 2008 veröffentlicht im Bundesanzeiger Nr. 84a (Beilage) vom 10. Juni 2009 in Kraft getreten am 1. April 2009 zuletzt geändert am 16. August 2018 veröffentlicht im Bundesanzeiger BAnz AT 05.03.2019 B2 in Kraft getreten am 6. März 2019
5. Gemeinsamer Bundesausschuss (2018) Verfahrensordnung (VerfO) des Gemeinsamen Bundesausschusses (G-BA) in der Version vom 05.07.2018: in der Fassung vom 18. Dezember 2008 veröffentlicht im Bundesanzeiger Nr. 84a (Beilage) vom 10. Juni 2009 in Kraft getreten am 1. April 2009 zuletzt geändert am 16. März 2018 veröffentlicht im Bundesanzeiger BAnz AT 04.07.2018 B1 in Kraft getreten am 5. Juli 2018
6. Institut für Qualität und Wirtschaftlichkeit im Gesundheitswesen (2017) Allgemeine Methoden: Version 5.0, Version 5.0. Institut für Qualität und Wirtschaftlichkeit im Gesundheitswesen (IQWiG), Köln
7. Hox JJ (2010) Multilevel analysis: Techniques and applications, 2. ed. Quantitative methodology series. Routledge Taylor & Francis, New York
8. Balas EA, Chapman WW (2018) Road Map For Diffusion Of Innovation In Health Care. *Health Affairs* 37:198–204. <https://doi.org/10.1377/hlthaff.2017.1155>
9. Deutschen Gesellschaft für Kardiologie - Herz- und Kreislaufforschung (2010) Infarkt-bedingter kardiogener Schock: Diagnose, Monitoring und Therapie. Leitlinie der Deutschen Gesellschaft für Kardiologie - Herz- und Kreislaufforschung
10. Ibanez B, James S, Agewall S et al. (2017) 2017 ESC Guidelines for the management of acute myocardial infarction in patients presenting with ST-segment elevation: The Task Force for the management of acute myocardial infarction in patients presenting with ST-segment elevation of the European Society of Cardiology (ESC). *Eur Heart J* 39:119–177. <https://doi.org/10.1093/eurheartj/ehx393>
